1

2

3 Acute stressors experienced by layer breeders do not affect measures of

4 stress and fear in their offspring

5

6 **Mariana R. L. V. Peixoto<sup>1</sup>, Niel A. Karrow<sup>1</sup>, Amy Newman<sup>2</sup>, Jessica Head<sup>3</sup>, Tina M.**  
7 **Widowski<sup>1\*</sup>**

8 <sup>1</sup>Department of Animal Biosciences, University of Guelph, Guelph, ON, N1G 2W1

9 <sup>2</sup>Department of Integrative Biology, University of Guelph, Guelph, ON, N1G 2W1

10 <sup>3</sup>Department of Natural Resource Sciences, McGill University, Ste. Anne de Bellevue, QC, H9X  
11 3V9

12

13

14 **\* Corresponding author:**

15 E-mail: [twidowsk@uoguelph.ca](mailto:twidowsk@uoguelph.ca)

16

## 17 **Abstract**

18           Stressors experienced by layer breeders during egg production can lead to changes in the  
19 egg hormone content, potentially impacting their offspring, the commercial layers. Genetic  
20 differences might also affect the offspring’s susceptibility to maternal experiences. In this study,  
21 we tested if maternal stress affects measures of stress and fear in five strains of layer breeders:  
22 commercial brown 1 & 2, commercial white 1 & 2 and a pure line White Leghorn. Each strain was  
23 equally separated into two groups: “Maternal Stress” (MS), where hens were subjected to a series  
24 of 8 consecutive days of acute psychological stressors, and “Control,” which received routine  
25 husbandry. Additional eggs from Control were injected either with corticosterone diluted in a  
26 vehicle solution (“CORT”) or just “Vehicle.” Stress- and fear-responses of the offspring were  
27 measured in a plasma corticosterone test and a combined human approach and novel object test.  
28 Both MS and CORT treatments failed to affect the measured endpoints in the offspring, but  
29 significant strain differences were found. The offspring of the white strains showed a higher  
30 physiological response compared to brown strains, but the White 2 offspring was consistently the  
31 least fearful strain in the behaviour tests. Our study found that the acute psychological stressors  
32 experienced by layer breeders did not affect the parameters tested in their offspring and that  
33 corticosterone does not seem to be the primary mediator of maternal stress in laying hens. This is  
34 highly important, as in poultry production, layer breeders are often subjected to short-term  
35 stressors. In addition, we successfully dissociated the physiological and behavioural parameters of  
36 stress response in laying hens, showing that increased concentrations of plasma corticosterone in  
37 response to stress is not directly associated with high levels of fear.

## 38 **Introduction**

39       The organizational structure of commercial layer breeding companies follows a pyramidal  
40 model; at the top of the pyramid is a relatively small population of pure line elite stock, followed  
41 by the grandparent stock, the parent stock, and the commercial layers at the base (Fig 1). In their  
42 lifetimes, layer breeders from the parent stock can produce approximately 115 commercial laying  
43 hens (1,2); therefore, a comparatively small number of breeders are needed to provide the total  
44 number of commercial layers in the egg system. Parent stocks are typically raised in mixed-sex  
45 groups of approximately 100 females per 8 males, either in floor systems housing thousands of  
46 birds or in smaller groups in colony breeder cages (2). Similar to the commercial layers, the parent  
47 stock may be exposed to stressful procedures and events, such as beak trimming (regulations vary  
48 across regions), human handling and social conflicts with other birds.

49

50 **Figure 1. The pyramidal model of layer breeding companies.** The organizational structure of  
51 commercial layer breeding companies, including the relative number of animals at each level  
52 (Modified from (1)).

53

54       Once believed that only genetic selection could shape the phenotype of the progeny, it is  
55 now known that the over-activation of the hypothalamic-pituitary-adrenal (HPA) axis (i.e., stress  
56 response) experienced by the female during egg production can have long-lasting effects in the  
57 offspring (3). It has been suggested that these “maternal effects” may shape the phenotype of  
58 offspring, which could be adaptive if mother and offspring share similar environments; or  
59 detrimental if their environments differ (“environmental matching hypothesis” (3)). Likewise,  
60 given that the global population of commercial layers is 7.6 billion birds (4), stressors experienced

61 by layer breeders during egg production may directly affect the growth and survival, and possibly,  
62 the overall welfare, of billions of commercial laying hens.

63         The effects of maternal stress in the offspring of birds and mammals are highly dependent  
64 on the intensity, timing of exposure and type of stressor experienced by the mother (5–7). Maternal  
65 stress can impact offspring’s physiology, behaviour and cognition (6,8) through structural and  
66 functional changes in brain areas involved in the mediation of fear and anxiety (9), as well as  
67 through changes in gene expression (10). We have previously shown that chicks from a  
68 commercial line of layer breeders that were subjected to daily sessions of psychological stressors  
69 during egg production showed a decreased occurrence of anxiety-like behaviour (measured in the  
70 total number of distress calls expressed during social isolation) compared to a control group (11).  
71 In addition, laying hens subjected to unpredictable feed restriction had chicks that stayed longer in  
72 tonic immobility (a measure of fearfulness) and spent less time eating when competing with birds  
73 from the control group for access to feed in a novel environment (12). Maternal stress has also  
74 been linked to changes in the HPA-axis of the offspring, increasing the concentration of plasma  
75 corticosterone in response to capture and restraint in Japanese quails, without changing their  
76 baseline hormone concentration (13).

77         One product of HPA-axis activation during stress in layer breeders is the glucocorticoid  
78 hormone corticosterone, which is naturally deposited into the yolk during egg formation (14), and  
79 is the exclusive source of glucocorticoids to the embryo until the 16<sup>th</sup> day of incubation, when the  
80 HPA-axis becomes fully functional (15). Due to its pleiotropic effects influencing the expression  
81 of thousands of genes, corticosterone has been suggested as a mediator of maternal effects on the  
82 offspring (16). Previous studies have shown strong effects on metabolic and developmental  
83 processes (6,8,17), but the extent to which corticosterone affects the behaviour of the offspring

84 remains unclear and appears to depend on delivery method and species (18). More recently, other  
85 biological components in the egg, such thyroid hormones (19,20), antioxidants (21),  
86 immunoglobulins (22), and especially androgens (23) have also been suggested as potential  
87 mediators of maternal stress in poultry species.

88         A laying hen's susceptibility to maternal stress might also be affected by the different  
89 behavioural and physiological responses to stressors observed across strains. In a study conducted  
90 with brown and white strains of commercial hybrids, De Haas et al. (24) found that high levels of  
91 maternal plasma corticosterone were directly linked to an increase in the occurrence of injurious  
92 behaviour (severe feather pecking) in the offspring of Dekalb White but not of ISA Brown hens.  
93 Moreover, domestication has increased susceptibility to maternal stress, as seen in a study  
94 comparing White Leghorn hens to their ancestor, the Red Junglefowl (25).

95         Although the literature on maternal stress in poultry species has vastly increased in the last  
96 decade (26), this is the first study of its kind to use both pure and commercial hybrid lines of layer  
97 breeders to further investigate the interaction between maternal stress, genetics and the behaviour  
98 and physiology of the offspring. For this, five strains of layer breeders were equally divided and  
99 subjected to either a maternal stress model ("MS") which involved subjecting the breeder hens to  
100 acute psychological stressors; or to a pharmacological stress model ("CORT"), in which  
101 corticosterone diluted in a vehicle solution was directly injected into the fertile egg from non-  
102 stressed hens ("Control"). A "Vehicle" treatment was included to account for the effects of egg  
103 manipulation. Measurements of stress response and fearfulness were assessed in the progeny at 13  
104 and 16 weeks of age, respectively. We predicted that the CORT treatment would show a strong  
105 effect in all strains and that the effects of MS would vary according to the natural resiliency of  
106 each strain of layer breeder.

107

## 108 **Material and methods**

109       The birds used in this study were treated in accordance with the Canadian Council on Animal  
110 Care, and all procedures were approved by the University of Guelph Animal Care Committee  
111 (Animal Utilization Protocol #1946). The strains presented herein were anonymized as required  
112 by the genetics companies that donated the eggs.

### 113 **Parent stock: Management**

114       A total of 2,600 fertilized eggs of 5 strains of parent stock were provided by the University  
115 of Guelph's Arkell Poultry Research Station (pure line White Leghorn) and by two commercial  
116 genetics companies: Brown 1 and White 1 from genetics company 1; and Brown 2 and White 2  
117 from genetics company 2. Each company donated 360 female- and 64 male-line hatching eggs per  
118 strain.

119       Eggs from all strains were collected from grandparent hens that were between 40 and 50  
120 weeks of age, subjected to identical incubation and chicks were reared and raised under similar  
121 husbandry conditions (17). Chicks were wing-banded at hatch, and each strain was equally  
122 distributed into 4 parent flocks that were randomly placed in 2 rooms containing 10 pens of 27  
123 birds (24 females and 3 males) each. Pens (3.7 m<sup>2</sup>) were enriched with pine shavings, one elevated  
124 perch and one lower perch, and 5 nest boxes were added at 18 weeks. Flocks were visually  
125 separated from each other and did not interact at any moment. Apart from the routine husbandry,  
126 all human interaction was avoided to prevent possible habituation.

## 127 **Parent stock: Experimental design**

128           Each strain of the parent stock had two pens assigned to the control treatment and two pens  
129 assigned to the MS treatment. The control groups were strictly submitted to regular husbandry,  
130 while MS hens were subjected to 8 consecutive daily sessions of acute psychological procedures  
131 at 3 different ages: 32, 52 and 72 weeks. At the end of the 8<sup>th</sup> day of stressors, fertile eggs from  
132 both treatments were collected, and additional eggs from the control treatment were either injected  
133 with corticosterone diluted in vehicle (10ng/mL egg content) (“CORT”) or just vehicle  
134 (“Vehicle”). All eggs were incubated, and the offspring flocks from each maternal age were treated  
135 as replicates over time (Fig 2). This experimental design allowed us to work with a larger sample  
136 size, but it also resulted in replicates confounded with incubatory settings, chick transfer and  
137 placement from the incubator to pens, and egg composition, since the nutritional value of the egg  
138 changes as a hen ages (27).

139

140 **Figure 2. Experimental design.** The Control treatment was subjected to regular husbandry, while  
141 hens from the Maternal Stress treatment were subjected to 3 sessions of 8 days of stressors prior  
142 to egg collection at different ages (32, 52 and 72 weeks). A subsample of eggs from the Control  
143 treatment were collected and injected with either corticosterone diluted in vehicle (“CORT”) or  
144 just vehicle (“Vehicle”). All eggs were collected and incubated under similar conditions and the  
145 different offspring groups were treated as replicates.

## 146 **Parent stock: Maternal Stress treatment**

147           The females of the MS flocks were subjected to daily sessions of acute psychological stress  
148 procedures that were selected based on their ability to increase plasma corticosterone concentration

149 in avian species (see references for each test below). Since the average time window for egg  
150 production from the beginning of vitellogenesis until laying is of approximately 8 days, each MS  
151 flock received a minimum of 8 consecutive days of stressors before the beginning of egg collection.  
152 Stressors and egg collection were performed until the total number of eggs necessary for  
153 incubation had been collected.

154 Each flock of the MS treatment was subjected twice to the following procedures: 1. Hens  
155 were equally distributed into 2 plastic crates (89 cm long × 60 cm wide × 26 cm high) (12 hens /  
156 crate), followed by 15 minutes of transportation (28); 2. Hens were individually removed from  
157 their home-pens and placed inside a cloth bag located in a nearby room for 10 minutes of physical  
158 restraint (29); 3. Hens were crated into 2 groups of 12 birds, transported to an empty room 400 m  
159 away from their home-pen and transferred to a test box (100 cm × 100 cm × 200 cm) constructed  
160 of solid white panels with 2 doors located on opposite walls and 2 LED lights on the ceiling for 30  
161 minutes. In the box, the hens were exposed to 3 simulations of a predator attack (30 seconds/each)  
162 using the silhouette of a sparrow-hawk made of black cardboard (35 cm × 50 cm)(30); 4. Hens  
163 were crated and transported to the test box for 15 minutes. During that time, an air horn was blown  
164 for 3 seconds every 5 minutes (31,32); 5. Hens were crated, transported to the test room and placed  
165 inside the test box for 30 minutes with hens from a different strain (43).

166 All hens were immediately returned to their home-pens after each stressor. The stress  
167 sessions respected the following criteria: 1. All flocks were subjected to one stressor a day; 2. The  
168 minimum interval between the application of the same stressor was 4 days to avoid a decrease in  
169 the physiological response of the birds due to repeated exposure (i.e., habituation); 3. The stressors  
170 were randomly applied from 9:00 to 16:00 h.



## 171 **Parent Stock: Vehicle and CORT Treatments**

172           Increased concentrations of maternal plasma corticosterone have been suggested as an  
173 efficient tool to increase corticosterone concentration in the egg (14). The CORT treatment aimed  
174 to increase the concentration of corticosterone in fertilized eggs from breeder hens. According to  
175 previous studies, the basal level of corticosterone in the plasma of laying hens ranges from 0.3 to  
176 5 ng/mL (34), reaching 30 ng/mL in response to stress (35). Previous studies reported that the  
177 concentration of corticosterone in egg yolks ranges from 0.77 to 2.8 ng/g in Hy-Line Brown (36–  
178 38) to average 1.6 ng/g in Hy-Line White (36) and 2.13 ng/g in Bovan White (39) under control  
179 conditions. The mean concentration of corticosterone in eggs from unstressed birds has been  
180 previously reported as 1.17 in yolk and 1.55 ng/mL albumen (40). However, analytical validation  
181 of enzyme- and radio-immunoassay techniques showed the presence of cross-reactive substances  
182 that hamper quantification of corticosterone in the yolk and albumen of eggs (41); and recent work  
183 has shown that even more precise techniques such as Celite or high performance liquid  
184 chromatography may not be sufficient to accurately quantify the corticosterone concentration in  
185 yolk (reviewed in Groothuis et al., (23)). Therefore, since the exact concentration of corticosterone  
186 in eggs from stressed birds remains unknown, we followed the methodology proposed by Janczak  
187 et al. (42) and described in Peixoto et al. (17), that was based on plasma corticosterone  
188 concentration of stressed hens.

189           Injections of 10 ng/mL cortisol diluted in sesame oil (“CORT”), or sesame oil alone  
190 (“Vehicle”) were used. One day before each egg incubation day, a thin layer of silicone sealant  
191 (General Electric, Boston, MA) was applied to a 2 cm x 3 cm area on the basal tip of a sub-sample  
192 of control eggs; this sealant prevents gas exchange and contamination following perforation and  
193 injection through the shell. On the morning of each incubation day, Vehicle and CORT solutions

194 were prepared. The average weight of egg content, which is estimated to be 90% of total egg  
195 weight (43), was 50, 50 and 59 g per hen age group; thus, a volume of 50  $\mu\text{L}$  of either CORT or  
196 Vehicle solutions were injected into eggs from 32 and 52 week-old breeders, while 60  $\mu\text{L}$  was  
197 injected into eggs from 72 week-old breeders. Injections were performed using a sterile 23-gauge  
198 needle through a small hole that was perforated through the silicone layer using an egg piercer.  
199 Eggs from all treatments were immediately incubated.

## 200 **Offspring Stock: Management and data collection**

201 Egg collection, incubation and hatch occurred under similar conditions for all offspring  
202 groups. Chicks from each maternal age were individually wing-banded at hatch. The placement of  
203 chicks was randomized for each strain and treatment across 40 pens (3.72 m<sup>2</sup>/each) equally  
204 distributed in 4 rooms. All pens were enriched with 2 perches and litter floor.

205 The offspring replicate groups aimed to comprise 2 pens with 20 chickens for each strain  
206 and treatment (10 female: 10 male); however, final densities varied due to lower hatchability of  
207 the injected eggs (17). The test orders for the procedures described below were balanced across  
208 period of the day for all flocks, strains and treatments, in order to minimize the effects of time and  
209 circadian rhythm on the results.

## 210 **Offspring stock: Plasma corticosterone**

211 To assess the birds' basal plasma corticosterone level, stress response and stress recovery, 3  
212 consecutive blood collections were drawn from chickens between 13 and 14 weeks of age (N =  
213 675; Table 1). Due to sampling difficulties, fewer samples were collected from birds from the first  
214 replicate group, especially the White Leghorn strain.

215           Following the methodology proposed by Wingfield (44) and replicated by Goerlich et al.,  
216 (45), selected birds were individually captured from their home pen, and a baseline blood sample  
217 was drawn from the wing vein within 3 minutes from capture. Following, the bird was placed  
218 inside a large cloth bag for 10 minutes and the second blood sample (“stress-induced response”)  
219 was collected. After 20 more minutes of physical restraint, the last sample was collected. All  
220 samples were centrifuged for 15 minutes with equipment settings at 2,500 RPM, 4.2 rotor at 4°C.  
221 Duplicates of each plasma sample were collected and stored at -4°C until analyses. Total  
222 glucocorticoid concentration in plasma was determined using a commercial corticosterone  
223 enzyme-linked immunosorbent assay (ELISA) kit (Enzo Life Sciences, NY, USA). Samples were  
224 tested in duplicate following a standard protocol (see the online manual: [http://www.](http://www.Enzolifesciences.com/ADI-900-097/corticosterone-eia-kit/)  
225 [Enzolifesciences.com/ADI-900-097/corticosterone-eia-kit/](http://www.Enzolifesciences.com/ADI-900-097/corticosterone-eia-kit/)). Our assay had a sensitivity of 21.75  
226 pg/ml and 13.6% and 6.0% inter-assay and intra-assay coefficients of variation, respectively.

**Table 1.** Number of birds tested by treatment, strain and replicate for each variable.

| Variable                                 | Treatment    | Brown 1   |           |           | Brown 2   |           |           | White 1   |           |           | White 2   |           |           | White Leghorn |           |           |
|------------------------------------------|--------------|-----------|-----------|-----------|-----------|-----------|-----------|-----------|-----------|-----------|-----------|-----------|-----------|---------------|-----------|-----------|
|                                          |              | Replicate |           |           | Replicate |           |           | Replicate |           |           | Replicate |           |           | Replicate     |           |           |
|                                          |              | 1         | 2         | 3         | 1         | 2         | 3         | 1         | 2         | 3         | 1         | 2         | 3         | 1             | 2         | 3         |
| <b>Stress Response</b>                   | Control      | 7         | 12        | 12        | 12        | 9         | 12        | 12        | 12        | 12        | 12        | 12        | 12        | 8             | 12        | 12        |
|                                          | M. Stress    | 7         | 12        | 12        | 12        | 12        | 12        | 10        | 12        | 12        | 12        | 12        | 12        | 9             | 12        | 12        |
|                                          | Vehicle      | 11        | 12        | 12        | 8         | 12        | 12        | 6         | 12        | 12        | 10        | 12        | 12        | 6             | 9         | 12        |
|                                          | CORT         | 12        | 12        | 11        | 8         | 12        | 11        | 11        | 12        | 12        | 7         | 12        | 12        | 6             | 11        | 10        |
|                                          | <b>Total</b> | <b>37</b> | <b>48</b> | <b>47</b> | <b>40</b> | <b>45</b> | <b>47</b> | <b>39</b> | <b>48</b> | <b>48</b> | <b>41</b> | <b>48</b> | <b>48</b> | <b>29</b>     | <b>44</b> | <b>46</b> |
| <b>Novel Object &amp; Human Approach</b> | Control      | -         | 4         | 4         | -         | 4         | 4         | -         | 4         | 4         | -         | 4         | 4         | -             | 4         | 4         |
|                                          | M. Stress    | -         | 4         | 4         | -         | 4         | 4         | -         | 4         | 4         | -         | 4         | 4         | -             | 4         | 4         |
|                                          | Vehicle      | -         | 4         | 4         | -         | 4         | 4         | -         | 4         | 4         | -         | 4         | 4         | -             | 4         | 4         |
|                                          | CORT         | -         | 4         | 4         | -         | 4         | 4         | -         | 4         | 4         | -         | 4         | 4         | -             | 4         | 4         |
|                                          | <b>Total</b> | -         | <b>16</b> | <b>16</b> | -         | <b>16</b> | <b>16</b> | -         | <b>16</b> | <b>16</b> | -         | <b>16</b> | <b>16</b> | -             | <b>16</b> | <b>16</b> |

## 229 **Offspring stock: Human approach and novel object test**

230 Fear behaviour can be quantified by measuring the conflicting motivation to approach or  
231 avoid a potentially dangerous stimulus (46). In the human approach (HA) and novel object (NO)  
232 test, we measured the duration of time that the birds spent in zones located a distance away from  
233 either a person and a novel object (umbrella) (47). The longer the duration of time spent away  
234 from the stressor, the more fearful the bird was considered to be.

235 Birds at 16 weeks of age (N = 160; Table 1) were tested in same-sex pairs. Testing was  
236 conducted in an arena located in a quiet room close to the birds' home-pens. The arena measured  
237 210 cm × 180 cm × 120 cm and contained a 50 cm × 50 cm × 70 cm habituation box at one end  
238 and a clear netting wall at the opposite side, from which the animals could see the stressor (person  
239 or NO) positioned 20 cm outside it. The floor was separated into two equal parts (Zone 1 and Zone  
240 2) that were used to determine the birds' location (Figures 3 and 4).

241  
242 **Figure 3. Illustration of the test arena used in the human approach and novel object**  
243 **tests.** Following a modified version of Brantsæter et al. (47), birds were placed in the habituation  
244 box ("Box") with access to the arena ("Zone 1" and "Zone 2") for 30 seconds. Then, with a person  
245 positioned at the other end of Zone 2, birds were given access to Zone 1. After 5 minutes, the  
246 person was replaced by an umbrella (NO). Recordings were done using a security camera, placed  
247 above the middle of the arena in the ceiling and a camcorder (Cam), located adjacently to the  
248 stressor.

249  
250 **Figure 4. Human approach and novel object arena.** A. Front view of the arena. B. Close-up of  
251 the habituation box positioned behind Zone 1.

252

253           The birds were marked with livestock paint two days before testing to allow for individual  
254 identification on video analyses. On the test day, each pair of animals was quietly removed from  
255 their home-pen and moved into the start box attached to the arena. After 30 seconds, a pull-up door  
256 was opened, giving the birds access to the arena. At this moment, the "observer" (a person who  
257 had not been seen by the birds on that day), was sitting on the chair, facing the arena, but avoiding  
258 direct eye contact with the animals. We used a total of three different observers, all women wearing  
259 a dark blue coverall. After 5 minutes in front of the animals, the observer opened a pink umbrella  
260 pointing to the arena, placed the object onto the chair, and quietly left the room, thus starting the  
261 novel object test, which also lasted 5 minutes. To record both tests, we used one camcorder  
262 (Panasonic HC-V180K) positioned adjacently to the stressor and one security camera (Panasonic  
263 WV-SPN531) attached to the ceiling, facing the centre of the arena.

264           Measurements of behaviour were analyzed from the video recordings by one observer  
265 blinded to treatment and strain. Chickens within pairs were individually identified based on their  
266 paint marking and their behaviour was quantified. Latency to leave the start box (s) and time spent  
267 in each zone (s) was assessed through continuous observation of both HA and NO tests. A bird's  
268 location was determined if both of the animal's feet were in the same zone. Since bird location  
269 varied at the beginning of the NO test,, we recorded where the birds were positioned when the  
270 umbrella was opened; and for those located outside of the box, their flight response to the umbrella  
271 (flight, freeze, walk; Table 2) (N = 132). Due to external factors, data from replicate 1 were not  
272 included in the analyses. All birds were immediately returned back to their home-pens after testing.

273

274

275

276 **Table 2.** Ethogram used in the human approach and novel object behaviour measurements.

| <b>Behaviour</b> | <b>Description</b>                                                           |
|------------------|------------------------------------------------------------------------------|
| Fly              | Bird jumps or initiate flying directed to surrounding, avoiding the stimulus |
| Freeze           | Bird stands upright and immobile for a minimum of 5 seconds                  |
| Walk             | Two or more steps, attending to surroundings, head erect                     |

277

## 278 **Statistical analyses**

279 The Glimmix procedure of SAS 9.4 (SAS Institute, Cary, NC) was used to perform all  
280 statistical analyses. The basic statistical model included fixed effects of treatment, strain, sex, and  
281 a treatment by strain interaction. Random effects were grouped by strain and included offspring  
282 group and pen nested in room. Further pre-planned comparisons included treatment (Control  
283 versus Maternal Stress and Control versus CORT), strain (white versus brown lines) and Genetic  
284 Company 1 (Brown 1 and White 1) versus Genetic Company 2 (Brown 2 and White 2). Tests for  
285 normality included Shapiro-Wilk and Anderson Darling measurements in conjunction with visual  
286 plots. When a positive interaction was found, analyses controlled for the multiple testing error  
287 using the percentage of false-positives, which estimates the false discovery rate (48). Significance  
288 was declared at  $P < 0.05$ .

## 289 **Plasma corticosterone**

290 The basic model in ANOVA was adjusted for repeated measures, and the following fixed  
291 effects were added: timepoint (baseline, 10 minutes and 30 minutes), timepoint by strain, and  
292 timepoint by treatment. The 3-way interaction “strain by treatment by timepoint” was not  
293 statistically significant ( $P = 0.755$ ) and was therefore removed from the model. Random effects

294 were grouped by strain and included offspring group and pen nested in room, with bird as the  
295 experimental unit. Data were assumed to be distributed according to a log-normal transformation.  
296 Significance post-FDR correction was set at  $P < 0.01$ . Least Square (LS-) means and standard error  
297 of means (SEM) were back-transformed and are presented in the results as the average  
298 concentration of corticosterone in plasma (ng/ml).

## 299 **Human approach and novel object**

300 Time spent in the arena was analyzed in ANOVA and results were partitioned by test. Fixed  
301 effects included the basic model plus zone (Box, Zone 1 and Zone 2), strain by zone, treatment by  
302 zone and sex by zone. The 3-way interaction “strain by treatment by zone” was not statistically  
303 significant (NO:  $P = 0.078$ ; HA:  $P = 0.067$ ) and was therefore removed from the model. Random  
304 effects were grouped by strain and included offspring group, pen nested in room and location in  
305 the arena at the beginning of each test; individual bird (nested in pair) was the experimental unit.  
306 To meet the assumption of a normal distribution, data were log-normally transformed. Significance  
307 post-FDR correction was set at  $P < 0.02$ . LS-means and SEM were back-transformed and are  
308 presented in the results as the average time (s) spent in each zone. The percentage of birds that  
309 spontaneously entered the arena and the type of response to stressor at the moment when the  
310 umbrella was opened were analyzed using a Chi-square test. Results are presented as the  
311 percentage of each response by strain.



## 312 Results

### 313 Plasma corticosterone

314 To measure if strain, treatment or sex affected corticosterone concentration in blood plasma  
315 at different timepoints, we specifically aimed for interactions between these effects and the time  
316 of collection (“timepoint”). The offspring from different treatments showed no differences in their  
317 plasma corticosterone concentration at any time of collection ( $P = 0.835$ ), but the average of  
318 corticosterone produced throughout the test varied among strains ( $P = 0.010$ ) (Table 3). As  
319 expected, corticosterone concentration increased in all strains 10 minutes after the onset of testing  
320 ( $P < 0.001$ ), but only the white strains showed a decrease in hormone concentration after 30  
321 minutes of restraint (Figure 5).

322  
323 **Table 3. Physical restraint test.** Effects of sex, strain, treatment and timepoint on plasma  
324 corticosterone concentrations and contrast comparisons by treatment and strain.

| <b>Stress Response</b> |                            |         |
|------------------------|----------------------------|---------|
| Effect                 |                            | P-value |
| Sex                    |                            | 0.156   |
| Strain                 |                            | < 0.001 |
| Treatment              |                            | 0.102   |
| Timepoint              |                            | < 0.001 |
| Strain x Treatment     |                            | 0.202   |
| Strain x Timepoint     |                            | 0.010   |
| Treatment x Timepoint  |                            | 0.835   |
| <b>Contrasts</b>       |                            |         |
|                        | Control vs Maternal Stress | 0.745   |
| Treatment              | Control vs Vehicle         | 0.717   |
|                        | Control vs CORT            | 0.693   |
| Strain                 | White vs Brown             | < 0.001 |
|                        | Genetic Company 1 vs 2     | 0.596   |

325

326 The baseline corticosterone concentration was similar for all strains; however, the White  
327 Leghorn offspring consistently showed the highest concentration of circulating corticosterone after  
328 10 and 30 minutes of physical restraint, while both commercial brown strains displayed the lowest  
329 values at the same timepoints (Figure 5). Post-hoc contrast analyses indicate a difference between  
330 the hormone concentration of brown- and white-coloured strains ( $P < 0.001$ ).

331

332 **Figure 5. Plasma corticosterone.** Mean corticosterone ( $\pm$  SEM) at baseline, 10 and 30  
333 minutes after onset of physical restraint, displayed by strain. Means with different superscripts (a-  
334 c) within the same timepoint differ ( $P < 0.01$ ).

## 335 **Human approach and novel object test**

336 Similar to plasma corticosterone, we specifically tested for interactions between a bird's  
337 location in the arena ("Zone") with strain, treatment and sex in order to find if time spent in  
338 different locations was affected by these variables. In the human approach test, the duration spent  
339 at the arena zones was not affected by treatment or sex but varied according to genetic strain (Table  
340 4). The Brown 2 offspring displayed the highest degrees of fear in HA, spending more time in the  
341 start box and less time close to the observer than the other strains. In contrast, the White Leghorn  
342 offspring showed the shortest latency to leave the box, while the White 2 offspring spent the  
343 longest duration closer to the person ("Zone 2"). Once in the arena, the birds did not return to the  
344 habituation box in any of the tests.

345

346 **Table 4. Human approach test.** Effects of sex, strain, treatment and arena zone ("Zone")  
347 on time spent in the arena and contrast comparisons by treatment and strain.

| <b>Human Approach</b>   |                            | <b>P-value</b> |
|-------------------------|----------------------------|----------------|
| <b>Sex</b>              |                            | 0.098          |
| <b>Strain</b>           |                            | 0.022          |
| <b>Treatment</b>        |                            | 0.274          |
| <b>Zone</b>             |                            | < 0.001        |
| <b>Sex x Zone</b>       |                            | 0.168          |
| <b>Strain x Zone</b>    |                            | < 0.001        |
| <b>Treatment x Zone</b> |                            | 0.684          |
| <b>Contrasts</b>        |                            |                |
|                         | Control vs Maternal Stress | 0.135          |
| <b>Treatment</b>        | Control vs Vehicle         | 0.451          |
|                         | Control vs CORT            | 0.408          |
|                         | White vs Brown             | 0.849          |
| <b>Strain</b>           | Genetic Company 1 vs 2     | 0.441          |

348

349

350 **Figure 6. Human approach test.** Average time (s) spent in different arena locations  
 351 (zones) displayed by strain ( $\pm$  SEM). Statistical differences in duration of time spent in different  
 352 zones across strains are indicated by letters (a-d) ( $P < 0.02$ ).

353

354 Treatment failed to affect the duration of time spent in different arena locations (zones)  
 355 during the novel object test; however, strain differences were found (Table 5). All strains spent  
 356 similar durations inside the box and in zone 1, but the White Leghorn offspring spent the shortest  
 357 duration in zone 2, standing out as the most fearful strain in the presence of a novel object. Females  
 358 showed a higher latency to leave the habituation box and spent less time close to the novel object  
 359 than males (Figure 8).

360

361 **Table 5. Novel object test.** Effects of sex, strain, treatment and arena zone (“Zone”) on  
 362 time spent in the arena and contrast comparisons by treatment and strain.

| <b>Novel Object</b>     |                            |                |
|-------------------------|----------------------------|----------------|
|                         |                            | <b>P-value</b> |
| <b>Sex</b>              |                            | 0.260          |
| <b>Strain</b>           |                            | 0.552          |
| <b>Treatment</b>        |                            | 0.780          |
| <b>Zone</b>             |                            | < 0.001        |
| <b>Sex x Zone</b>       |                            | 0.002          |
| <b>Strain x Zone</b>    |                            | < 0.001        |
| <b>Treatment x Zone</b> |                            | 0.982          |
| <b>Contrasts</b>        |                            |                |
| <b>Treatment</b>        | Control vs Maternal Stress | 0.794          |
|                         | Control vs Vehicle         | 0.597          |
|                         | Control vs CORT            | 0.688          |
| <b>Strain</b>           | White vs Brown             | 0.153          |
|                         | Genetic Company 1 vs 2     | 0.709          |

363

364

365 **Figure 7. Novel object test.** Average time (s) spent in different arena locations displayed by  
 366 strain ( $\pm$  SEM). Statistical differences in duration of time spent in different zones across strains  
 367 are indicated by letters (a-c) ( $P < 0.02$ ).

368

369 **Figure 8. Novel object test.** Average time (s) spent in different arena locations displayed by sex  
 370 ( $\pm$  SEM). Statistical differences in duration of time spent in different zones between females and  
 371 males are indicated by letters (a-c) ( $P < 0.02$ ).

372

373 Descriptive statistics of the birds' location at the moment when the umbrella was opened are  
 374 presented in Table 6, with 61.9% in Zone 1. Behaviour response to sudden movement (umbrella  
 375 opening) varied among strains; commercial- and pure line-white strains flew away from the  
 376 umbrella more frequently than both brown strains (Fig 9).

377

378 **Table 6.** Location of the birds at the moment when the umbrella was opened.

| Strain        | Location |      |        |      |        |      |
|---------------|----------|------|--------|------|--------|------|
|               | Box      |      | Zone 1 |      | Zone 2 |      |
|               | #        | %    | #      | %    | #      | %    |
| Brown 1       | 7        | 22.5 | 18     | 57.0 | 7      | 22.5 |
| Brown 2       | 6        | 17.0 | 22     | 70.0 | 4      | 13.0 |
| White 1       | 5        | 15.5 | 20     | 62.5 | 7      | 22.0 |
| White 2       | 4        | 14.0 | 15     | 47.0 | 13     | 39.0 |
| White Leghorn | 7        | 22.0 | 24     | 76.0 | 1      | 2.0  |
| Total         | 29       | 18.1 | 99     | 61.9 | 32     | 20.0 |

379

380

381 **Figure 9. Behaviour response to opening umbrella.** Percentages are displayed by strain.

382 Statistical differences within strain are indicated by letters (a,b) ( $P < 0.05$ ).

## 383 Discussion

### 384 Treatment, strain and sex effects

385 In this study, we examined the effects of maternal stress on the stress response and  
386 fearfulness of the offspring from different strains of layer breeders. We predicted that CORT would  
387 show a strong effect in all strains and that the effects of MS would vary according to the natural  
388 susceptibility of each strain. None of the stress treatments affected the traits measured, but strain  
389 and sex differences were observed in the progeny.

390 Our results show that the acute stressors experienced by layer breeders during egg  
391 production did not shape the behaviour or the stress response of commercial layers. Previous work  
392 in poultry that subjected females to long-term, chronic stressors, report carry-over effects on  
393 behaviour and physiology of offspring (13,31,49), however ours is the first test of acute stress.

394 Moreover, the mothers of the birds tested in the previous studies were housed in cages, a  
395 contributing factor to the occurrence of maternal effects (50). Our work is highly important, as in  
396 poultry production, breeders are often subjected to acute stressors (such as handling, vaccination  
397 and loud noises) and these data suggest that these experiences do not seem to affect the offspring.

398 The lack of results in the CORT treatment suggests a weak or inexistent biological link  
399 between maternal corticosterone and the offspring's phenotype, as previously reported in a  
400 passerine species (18). It is possible that the corticosterone concentration used in this study was  
401 not sufficient to shape the phenotype of the offspring. However, it is most likely that puncturing  
402 and injecting the fertile egg moments prior to incubation, as well as applying a silicon sealant onto  
403 the egg surface, are highly invasive and unnatural procedures, which might have exposed the  
404 progeny to an additional stressor and unintentionally selected a subset of birds that were more  
405 resilient to the adverse effects of the injection; thus, limiting the generalization of these results.

406 Although no treatment effects were observed, our study revealed significant differences in  
407 both behavioural and physiological measures among strains. Results show that the white strains  
408 produced more corticosterone in response to physical restraint, approached the person and the  
409 novel object more frequently and showed greater flight response (avoidance behaviour) when  
410 startled by the umbrella than the brown strains.

411 Behavioural and physiological responses to stress are commonly interpreted along a  
412 proactive-reactive continuum (51). Proactive animals tend to produce lower physiological  
413 response to stress (e.g., corticosterone) and have a fast response to a novel stimulus (e.g. fast  
414 approach, more aggressive); whereas reactive animals produce higher physiological response to a  
415 stressor and display a slow and shy behaviour response (e.g., slower approach, more passive  
416 towards a stimulus) (52,53). Our study showed that all white strains produced more corticosterone

417 in response to physical restraint, suggesting a reactive physiological profile. However, the White  
418 2 strain approached both novel stimuli more rapidly than the other strains and displayed a faster  
419 avoidance response to the startling stimulus, thus characterizing a proactive behavioural profile.

420 Mammals and passerines typically display the same profile for both behavioural and  
421 physiological responses to stress, thus characterizing the concept of “coping style” (51). In  
422 agreement with previous studies (36,53–56), our results show that this concept does not apply to  
423 laying hens. Although the majority of birds from the White 2 strain flew away from the umbrella  
424 and showed a high concentration of corticosterone in response to physical restraint, they  
425 consistently spent more time close the human and the novel object, standing out as the least fearful  
426 strain in the behaviour tests. In a previous publication, we also reported that these same white  
427 strains produced fewer distress calls in response to social isolation and spent less time in tonic  
428 immobility, a measure of fearfulness in chickens, compared to the brown strains (11). Our results,  
429 thus, suggest a dissociation between stress reactivity and fearfulness in laying hens.

430 In many species, physiological traits are associated with pigmentation (57,58) and melanism  
431 has been shown to signal the ability to cope with elevated stress hormones in barn owls (59).  
432 Effects on aggressive behaviour have also been found (60), but to our knowledge, no studies have  
433 yet focused on feather pigmentation and fear-response in birds. Nevertheless, another interesting  
434 finding is that the offspring of the Brown 2 strain showed higher degrees of fear of humans, while  
435 the offspring of the White 1 and White Leghorn strains displayed a higher response in the presence  
436 of the novel object, suggesting that white strains of laying hens might be more fearful of objects  
437 than the brown strains. It is important to mention that the greater distances from the novel object  
438 observed in the white strains are most likely related to these strains’ response to the umbrella  
439 opening. Nonetheless, previous studies have shown that White Leghorn hens were found to be

440 more fearful of a novel object than hens from a Rhode Island Red strain (61), and a positive  
441 correlation between fear of a novel object and low body weight in chickens was found (white  
442 strains are commonly lighter than browns) (56). Inconsistent results are found in the measurement  
443 of fear of humans, possibly depending on other environmental factors, such as husbandry, level of  
444 exposure to humans and previous experiences (56). Our findings, thus, suggest that the occurrence  
445 of fear-like behaviour in a laying hen depends on the interaction between her genetics and the  
446 source of fear.

447 Lastly, we observed that cockerels spent more time close to the umbrella in the novel object  
448 test, displaying lower degrees of fear than the hens in that test. The behaviour of animals are  
449 mediated by two gonadal hormones, androgen and estrogen (62). Individually and combined, these  
450 hormones act on the neural system, organizing the neuronal circuitry involved in behavioural  
451 functions (62,63), thus explaining the occurrence of sex differences in behavioural traits. Sexual  
452 dimorphism on fear-related behaviour can also be linked to genetic selection for productive traits  
453 through pleiotropic effects; a quantitative trait loci (QTL) related to fear response in the novel  
454 object test was found to share positions with a major QTL for growth and body weight in cockerels,  
455 but not in hens (64).

456

## 457 **Limitations, challenges and future opportunities**

458 The physical restraint procedure is a well validated test (39) that was used twice in this study:  
459 as a stressor in the parent stock and as a measure of stress response in the offspring. As previously  
460 reported (11), the layers from the MS treatment were still physiologically responsive to the stressor  
461 even after repeated exposure, therefore, validating the physical restraint test as a stressor in the MS



462 treatment. However, no further stressors applied onto the breeder flock in the MS treatment were  
463 validated, thus limiting the discussion on whether the lack of effects in the progeny of MS breeders  
464 is due to a natural resilience of the breeder hens to the chosen stressors, or to an embryonic  
465 resilience to increased hormone levels deposited into the egg by the stressed breeder. Moreover,  
466 only the total concentration of corticosterone was measured in the study; but glucocorticoids can  
467 be found in both biologically active and inactive forms in the blood. Biologically active (i.e., free)  
468 corticosterone is able to bind to receptors within the tissues, whereas glucocorticoids bound to a  
469 protein carrier (predominantly corticosteroid-binding globulin (65)) are inactive. To accurately  
470 quantify the potential biological activity of corticosterone in plasma samples, it would be necessary  
471 to know the concentration of free corticosterone in comparison with total corticosterone (reviewed  
472 in 45).

473 A challenge faced in this study is that the actual concentration of corticosterone transferred  
474 from the mother to egg remains largely unknown (Rettenbacher et al., 2009, 2013a; Almasi et al.,  
475 2012) and may differ across strains (Navarra and Pinson, 2010). Although analytical techniques  
476 such as Celite and HPLC are more precise than the often used enzyme- and radio-immunoassay,  
477 they may still not be sufficiently accurate to quantify the concentration of corticosterone in the  
478 yolk (reviewed in Groothuis et al., (23)). Therefore, the hormone concentration used in our  
479 injections might have been lower than the physiological range of different strains of breeder hens,  
480 thus explaining the negative findings. In follow-up studies it would be important to explore any  
481 strain-related differences in corticosterone levels transfer to eggs. Moreover, we strongly  
482 encourage further investigation other biological mechanisms different than corticosterone. the  
483 Currently, the use of hormone injections in fertile eggs as a model for maternal stress remains  
484 questionable.

## 485 **Conclusion**

486 This research successfully shows that acute stressors such as brief transportation, physical  
487 restraint or loud auditory noise experienced by layer breeders during egg production, do not shape  
488 the behaviour or the stress response of their offspring, the commercial layers. This finding has  
489 significant importance in the agricultural field, as layers breeders are constantly subjected to  
490 different types of acute stressors in their lifetimes.

491 Our results also suggest the disconnection between stress reactivity and fearfulness in  
492 laying hens, in which high plasma concentration of corticosterone should not be associated with a  
493 more fearful personality. In addition, the occurrence of fear-like behaviour in layers depends on  
494 their genetics and the source of fear, varying in response to the source of stimuli. The implications  
495 of this study in both scientific and agricultural fields are numerous, as variations in behavioural  
496 and physiological responses to stress can be decisive when assessing different strains of layers, or  
497 when determining the overall adaptability of a strain to a specific housing system; therefore, having  
498 significant welfare and economic impacts in the egg production system.

## 499 **Bibliography**

- 500 1. Lohmann Tierzucht. Lohmann Brown Lohmann LSL Management Guide [Internet]. 2017  
501 [cited 2019 Oct 13]. p. 47. Available from: [http://www.ltz.de/en/downloads/management-](http://www.ltz.de/en/downloads/management-guides.php)  
502 [guides.php](http://www.ltz.de/en/downloads/management-guides.php)
- 503 2. Hy-Line International. Management Guide - HyLine Brown Parent Stock [Internet]. 2016  
504 [cited 2019 Oct 13]. p. 44. Available from:  
505 [https://www.hyline.com/userdocs/pages/BRN\\_PS\\_ENG.pdf](https://www.hyline.com/userdocs/pages/BRN_PS_ENG.pdf)

- 506 3. Sheriff MJ, Love OP. Determining the adaptive potential of maternal stress. *Ecol Lett.*  
507 2013;16(2):271–80.
- 508 4. FAO. No Title. 2018.
- 509 5. Lay DC, Wilson ME. Development of the chicken as a model for prenatal stress. *J Anim*  
510 *Sci.* 2002;80(7):1954–61.
- 511 6. Dixon LM, Sparks NHC, Rutherford KMD. Early experiences matter: A review of the  
512 effects of prenatal environment on offspring characteristics in poultry. *Poult Sci.*  
513 2016;95(3):489–99.
- 514 7. Kapoor A, Matthews SG. Prenatal stress modifies behavior and hypothalamic-pituitary-  
515 adrenal function in female guinea pig offspring: Effects of timing of prenatal stress and  
516 stage of reproductive cycle. *Endocrinology.* 2008;149(12):6406–15.
- 517 8. Henriksen R, Rettenbacher S, Groothuis TGG. Prenatal stress in birds: Pathways, effects,  
518 function and perspectives. *Neurosci Biobehav Rev.* 2011;35(7):1484–501.
- 519 9. Weinstock M. The long-term behavioural consequences of prenatal stress. Vol. 32,  
520 *Neuroscience and Biobehavioral Reviews.* 2008. p. 1073–86.
- 521 10. Nätt D, Lindqvist N, Stranneheim H, Lundeberg J, Torjesen PA, Jensen P. Inheritance of  
522 acquired behaviour adaptations and brain gene expression in chickens. *PLoS One.*  
523 2009;4(7).
- 524 11. Peixoto MRLV, Karrow NA, Newman A, Widowski TM. Effects of maternal stress on  
525 measures of anxiety and fearfulness in different strains of laying hens. *Front Vet Sci.*  
526 2020;In press.
- 527 12. Janczak AM, Torjesen P, Palme R, Bakken M. Effects of stress in hens on the behaviour  
528 of their offspring. *Appl Anim Behav Sci.* 2007;107(1–2):66–77.

- 529 13. Hayward LS, Wingfield JC. Maternal corticosterone is transferred to avian yolk and may  
530 alter offspring growth and adult phenotype. *Gen Comp Endocrinol.* 2004;135(3):365–71.
- 531 14. Almasi B, Rettenbacher S, Müller C, Brill S, Wagner H, Jenni L. Maternal corticosterone  
532 is transferred into the egg yolk. *Gen Comp Endocrinol.* 2012;178(1):139–44.
- 533 15. Jenkins SA, Porter TE. Ontogeny of the hypothalamo-pituitary-adrenocortical axis in the  
534 chicken embryo: A review. *Domest Anim Endocrinol.* 2004;26(4):267–75.
- 535 16. Cottrell EC, Seckl JR. Prenatal stress, glucocorticoids and the programming of adult  
536 disease. *Front Behav Neurosci.* 2009;3(SEP):1–9.
- 537 17. Peixoto MRLV, Karrow NA, Widowski TM. Effects of prenatal stress and genetics on  
538 embryonic survival and offspring growth of laying hens. *Poult Sci.* 2020;In press.
- 539 18. Garamszegi LZ, Rosivall B, Rettenbacher S, Markó G, Zsebok S, Szöllosi E, et al.  
540 Corticosterone, Avoidance of Novelty, Risk-Taking and Aggression in a Wild Bird: No  
541 Evidence for Pleiotropic Effects. *Ethology.* 2012;118(7):621–35.
- 542 19. Ruuskanen S, Hsu B-Y. Maternal Thyroid Hormones: An Unexplored Mechanism  
543 Underlying Maternal Effects in an Ecological Framework. *Physiol Biochem Zool.*  
544 2018;91(3):904–16.
- 545 20. Ruuskanen S, Darras VM, Visser ME, Groothuis TGG. Effects of experimentally  
546 manipulated yolk thyroid hormone levels on offspring development in a wild bird species.  
547 *Horm Behav.* 2016;81:38–44.
- 548 21. Possenti CD, Secomandi S, Schiavon A, Caprioli M, Rubolini D, Romano A, et al.  
549 Independent and combined effects of egg pro- and anti-oxidants on gull chick phenotype.  
550 *J Exp Biol.* 2018;221(Pt 9):jeb174300.
- 551 22. Roth O, Beemelmans A, Barribeau SM, Sadd BM. Recent advances in vertebrate and

- 552 invertebrate transgenerational immunity in the light of ecology and evolution. *Heredity*  
553 (Edinb). 2018;121(3):225–38.
- 554 23. Groothuis TGG, Hsu B-Y, Kumar N, Tschirren B. Revisiting mechanisms and functions  
555 of prenatal hormone-mediated maternal effects using avian species as a model. *Philos*  
556 *Trans R Soc B Biol Sci*. 2019;374(1770):20180115.
- 557 24. De Haas EN, Bolhuis JE, Kemp B, Groothuis TGG, Rodenburg TB. Parents and early life  
558 environment affect behavioral development of laying hen chickens. *PLoS One*.  
559 2014;9(3):e90577.
- 560 25. Nätt D, Nätt D, Rubin C-J, Wright D, Johnsson M, Beltéky J, et al. Heritable genome-  
561 wide variation of gene expression and promoter methylation between wild and  
562 domesticated chickens. *BMC Genomics*. 2012;13(13):59.
- 563 26. Podmokła E, Drobniak SM, Rutkowska J. Chicken or egg? Outcomes of experimental  
564 manipulations of maternally transmitted hormones depend on administration method – a  
565 meta-analysis. *Biol Rev*. 2018;93(3):1499–517.
- 566 27. Nielsen H. Hen age and fatty acid composition of egg yolk lipid. *Br Poult Sci*.  
567 1998;39(1):53–6.
- 568 28. Beuving G, Vonder GMA. Effect of stressing factors on corticosterone levels in the  
569 plasma of laying hens. *Gen Comp Endocrinol*. 1978;35(2):153–9.
- 570 29. Ericsson M, Henriksen R, Beltéky J, Sundman AS, Shionoya K, Jensen P. Long-term and  
571 transgenerational effects of stress experienced during different life phases in chickens  
572 (*Gallus gallus*). *PLoS One*. 2016;11(4).
- 573 30. Pitk M, Tilgar V, Kilgas P, Mänd R. Acute stress affects the corticosterone level in bird  
574 eggs: A case study with great tits (*Parus major*). *Horm Behav*. 2012;62(4):475–9.

- 575 31. Guibert F, Richard-Yris MA, Lumineau S, Kotrschal K, Bertin A, Petton C, et al.  
576 Unpredictable mild stressors on laying females influence the composition of Japanese  
577 quail eggs and offspring's phenotype. *Appl Anim Behav Sci.* 2011;132(1–2):51–60.
- 578 32. Rich EL, Romero LM. Exposure to chronic stress downregulates corticosterone responses  
579 to acute stressors. *Am J Physiol Regul Integr Comp Physiol* [Internet].  
580 2005;288(6):R1628-36. Available from: <http://www.ncbi.nlm.nih.gov/pubmed/15886358>
- 581 33. Siegel HS. *Physiological Stress in Birds*. Bioscience. 1980;30(8):529–34.
- 582 34. Scanes CG. Biology of stress in poultry with emphasis on glucocorticoids and the  
583 heterophil to lymphocyte ratio. *Poult Sci.* 2016;95(9):2208–15.
- 584 35. Johnston PA, Liu H, O'Connell T, Phelps P, Bland M, Tyczkowski J, et al. Applications  
585 in In Ovo Technology. *Poult Sci.* 1997;76(1):165–78.
- 586 36. Navara KJ, Pinson SE. Yolk and albumen corticosterone concentrations in eggs laid by  
587 white versus brown caged laying hens. *Poult Sci.* 2010;89(7):1509–13.
- 588 37. Ahmed AA, Ma W, Ni Y, Wang S, Zhao R. Corticosterone in ovo modifies aggressive  
589 behaviors and reproductive performances through alterations of the hypothalamic-  
590 pituitary-gonadal axis in the chicken. *Anim Reprod Sci.* 2014;146(3–4):193–201.
- 591 38. Engel JM, Widowski TM, Tilbrook AJ, Butler KL, Hemsworth PH. The effects of floor  
592 space and nest box access on the physiology and behavior of caged laying hens. *Poult Sci.*  
593 2019;98(2):533–47.
- 594 39. Haussmann MF, Longenecker AS, Marchetto NM, Juliano SA, Bowden RM. Embryonic  
595 exposure to corticosterone modifies the juvenile stress response, oxidative stress and  
596 telomere length. *Proc R Soc B Biol Sci.* 2012;279(1732):1447–56.
- 597 40. Eriksen MS, Haug A, Torjesen PA, Bakken M. Prenatal exposure to corticosterone

- 598 impairs embryonic development and increases fluctuating asymmetry in chickens (*Gallus*  
599 *gallus domesticus*). *Br Poult Sci.* 2003;44(5):690–7.
- 600 41. Rettenbacher S, Groothuis TG, Henriksen R, Möstl E. Corticosterone in bird eggs: The  
601 importance of analytical validation. *Wien Tierarztl Monatsschr.* 2013;100(9–10):283–90.
- 602 42. Janczak AM, Haung A, Bakken M. Janczak et al 2007 Evaluation of experimental  
603 methods for manipulating chicken egg hormone content using injections.pdf. *J Anim Vet*  
604 *Adv.* 2007;6(4):500–4.
- 605 43. Beuving G, Vonder GMA. The influence of ovulation and oviposition on corticosterone  
606 levels in the plasma of laying hens. *Gen Comp Endocrinol.* 1981;44(3):382–8.
- 607 44. Wingfield JC. Modulation of the adrenocortical response to stress in birds. *Perspect Comp*  
608 *Endocrinol XXII International Congr Comp Endocrinol Toronto, Ontario, Canada.* 1994;
- 609 45. Goerlich VC, Nätt D, Elfving M, Macdonald B, Jensen P. Transgenerational effects of  
610 early experience on behavioral, hormonal and gene expression responses to acute stress in  
611 the precocial chicken. *Horm Behav.* 2012;61(5):711–8.
- 612 46. Elliot AJ, Covington M V. Approach and Avoidance Motivation. *Educ Psychol Rev.*  
613 2001;13(2):73–92.
- 614 47. Brantsæter M, Nordgreen J, Rodenburg TB, Tahamtani FM, Popova A, Janczak AM.  
615 Exposure to increased environmental complexity during rearing reduces fearfulness and  
616 increases use of three-dimensional space in laying hens (*Gallus gallus domesticus*). *Front*  
617 *Vet Sci.* 2016;3(FEB):1–10.
- 618 48. García L V, García L V. Controlling the false discovery rate in ecological research.  
619 *Trends Ecol Evol.* 2016;18(11):553–4.
- 620 49. Janczak AM, Braastad BO, Bakken M. Behavioural effects of embryonic exposure to

- 621 corticosterone in chickens. *Appl Anim Behav Sci*. 2006;96(1–2):69–82.
- 622 50. Bulmer E, Gil D. Chronic stress in battery hens: Measuring corticosterone in laying hen  
623 eggs. *Int J Poult Sci*. 2008;
- 624 51. Koolhaas JM, Korte SM, De Boer SF, Van Der Vegt BJ, Van Reenen CG, Hopster H, et  
625 al. Coping styles in animals: current status in behavior and stress-physiology. *Neurosci*  
626 *Biobehav Rev* [Internet]. 1999;23(7):925–35. Available from:  
627 <http://www.ncbi.nlm.nih.gov/pubmed/10580307>
- 628 52. Carere C, Caramaschi D, Fawcett TW. Covariation between personalities and individual  
629 differences in coping with stress: Converging evidence and hypotheses. *Curr Zool*.  
630 2010;56(6):728–40.
- 631 53. Groothuis TGG, Carere C. Avian personalities: Characterization and epigenesis. *Neurosci*  
632 *Biobehav Rev*. 2005;29(1 SPEC. ISS.):137–50.
- 633 54. Tixier-Boichard M, Bed’Hom B, Rognon X. Chicken domestication: From archeology to  
634 genomics. *Comptes Rendus - Biol*. 2011;334(3):197–204.
- 635 55. Pusch EA, Bentz AB, Becker DJ, Navara KJ. Behavioral phenotype predicts physiological  
636 responses to chronic stress in proactive and reactive birds. *Gen Comp Endocrinol*.  
637 2018;255:71–7.
- 638 56. de Haas EN, Kemp B, Bolhuis JE, Groothuis T, Rodenburg TB. Fear, stress, and feather  
639 pecking in commercial white and brown laying hen parent-stock flocks and their  
640 relationships with production parameters. *Poult Sci*. 2013;92(9):2259–69.
- 641 57. Roulin A. Proximate basis of the covariation between a melanin-based female ornament  
642 and offspring quality. *Oecologia*. 2004;
- 643 58. Roulin A, Ducrest AL. Association between melanism, physiology and behaviour: A role



- 644 for the melanocortin system. *Eur J Pharmacol* [Internet]. 2011;660(1):226–33. Available  
645 from: <http://dx.doi.org/10.1016/j.ejphar.2011.01.036>
- 646 59. Almasi B, Roulin A, Korner-Nievergelt F, Jenni-Eiermann S, Jenni L. Coloration signals  
647 the ability to cope with elevated stress hormones: Effects of corticosterone on growth of  
648 barn owls are associated with melanism. *J Evol Biol*. 2012;25(6):1189–99.
- 649 60. Van Den Brink V, Dolivo V, Falourd X, Dreiss AN, Roulin A. Melanic color-dependent  
650 antipredator behavior strategies in barn owl nestlings. *Behav Ecol*. 2012;
- 651 61. Fraisse F, Cockrem JF. Corticosterone and fear behaviour in white and brown caged  
652 laying hens. *Br Poult Sci*. 2006;47(2):110–9.
- 653 62. Palanza P. Animal models of anxiety and depression: How are females different?  
654 *Neurosci Biobehav Rev*. 2001;25(3):219–33.
- 655 63. Carlsson M, Carlsson A. A regional study of sex differences in rat brain serotonin. *Prog*  
656 *Neuropsychopharmacol Biol Psychiatry*. 1988;12(1):53–61.
- 657 64. Schütz KE, Kerje S, Jacobsson L, Forkman B, Carlborg Ö, Andersson L, et al. Major  
658 Growth QTLs in Fowl Are Related to Fearful Behavior: Possible Genetic Links between  
659 Fear Responses and Production Traits in a Red Junglefowl x White Leghorn Intercross.  
660 *Behav Genet*. 2004;34(1):121–30.
- 661 65. Breuner CW, Orchinik M, Hahn TP, Meddle SL, Moore IT, Owen-Ashley NT, et al.  
662 Differential mechanisms for regulation of the stress response across latitudinal gradients.  
663 *Am J Physiol - Regul Integr Comp Physiol*. 2003;285(3):R594–600.
- 664 66. Ralph CR, Tilbrook AJ. Invited Review: The usefulness of measuring glucocorticoids for  
665 assessing animal welfare. Vol. 94, *Journal of Animal Science*. 2016. p. 457–70.
- 666

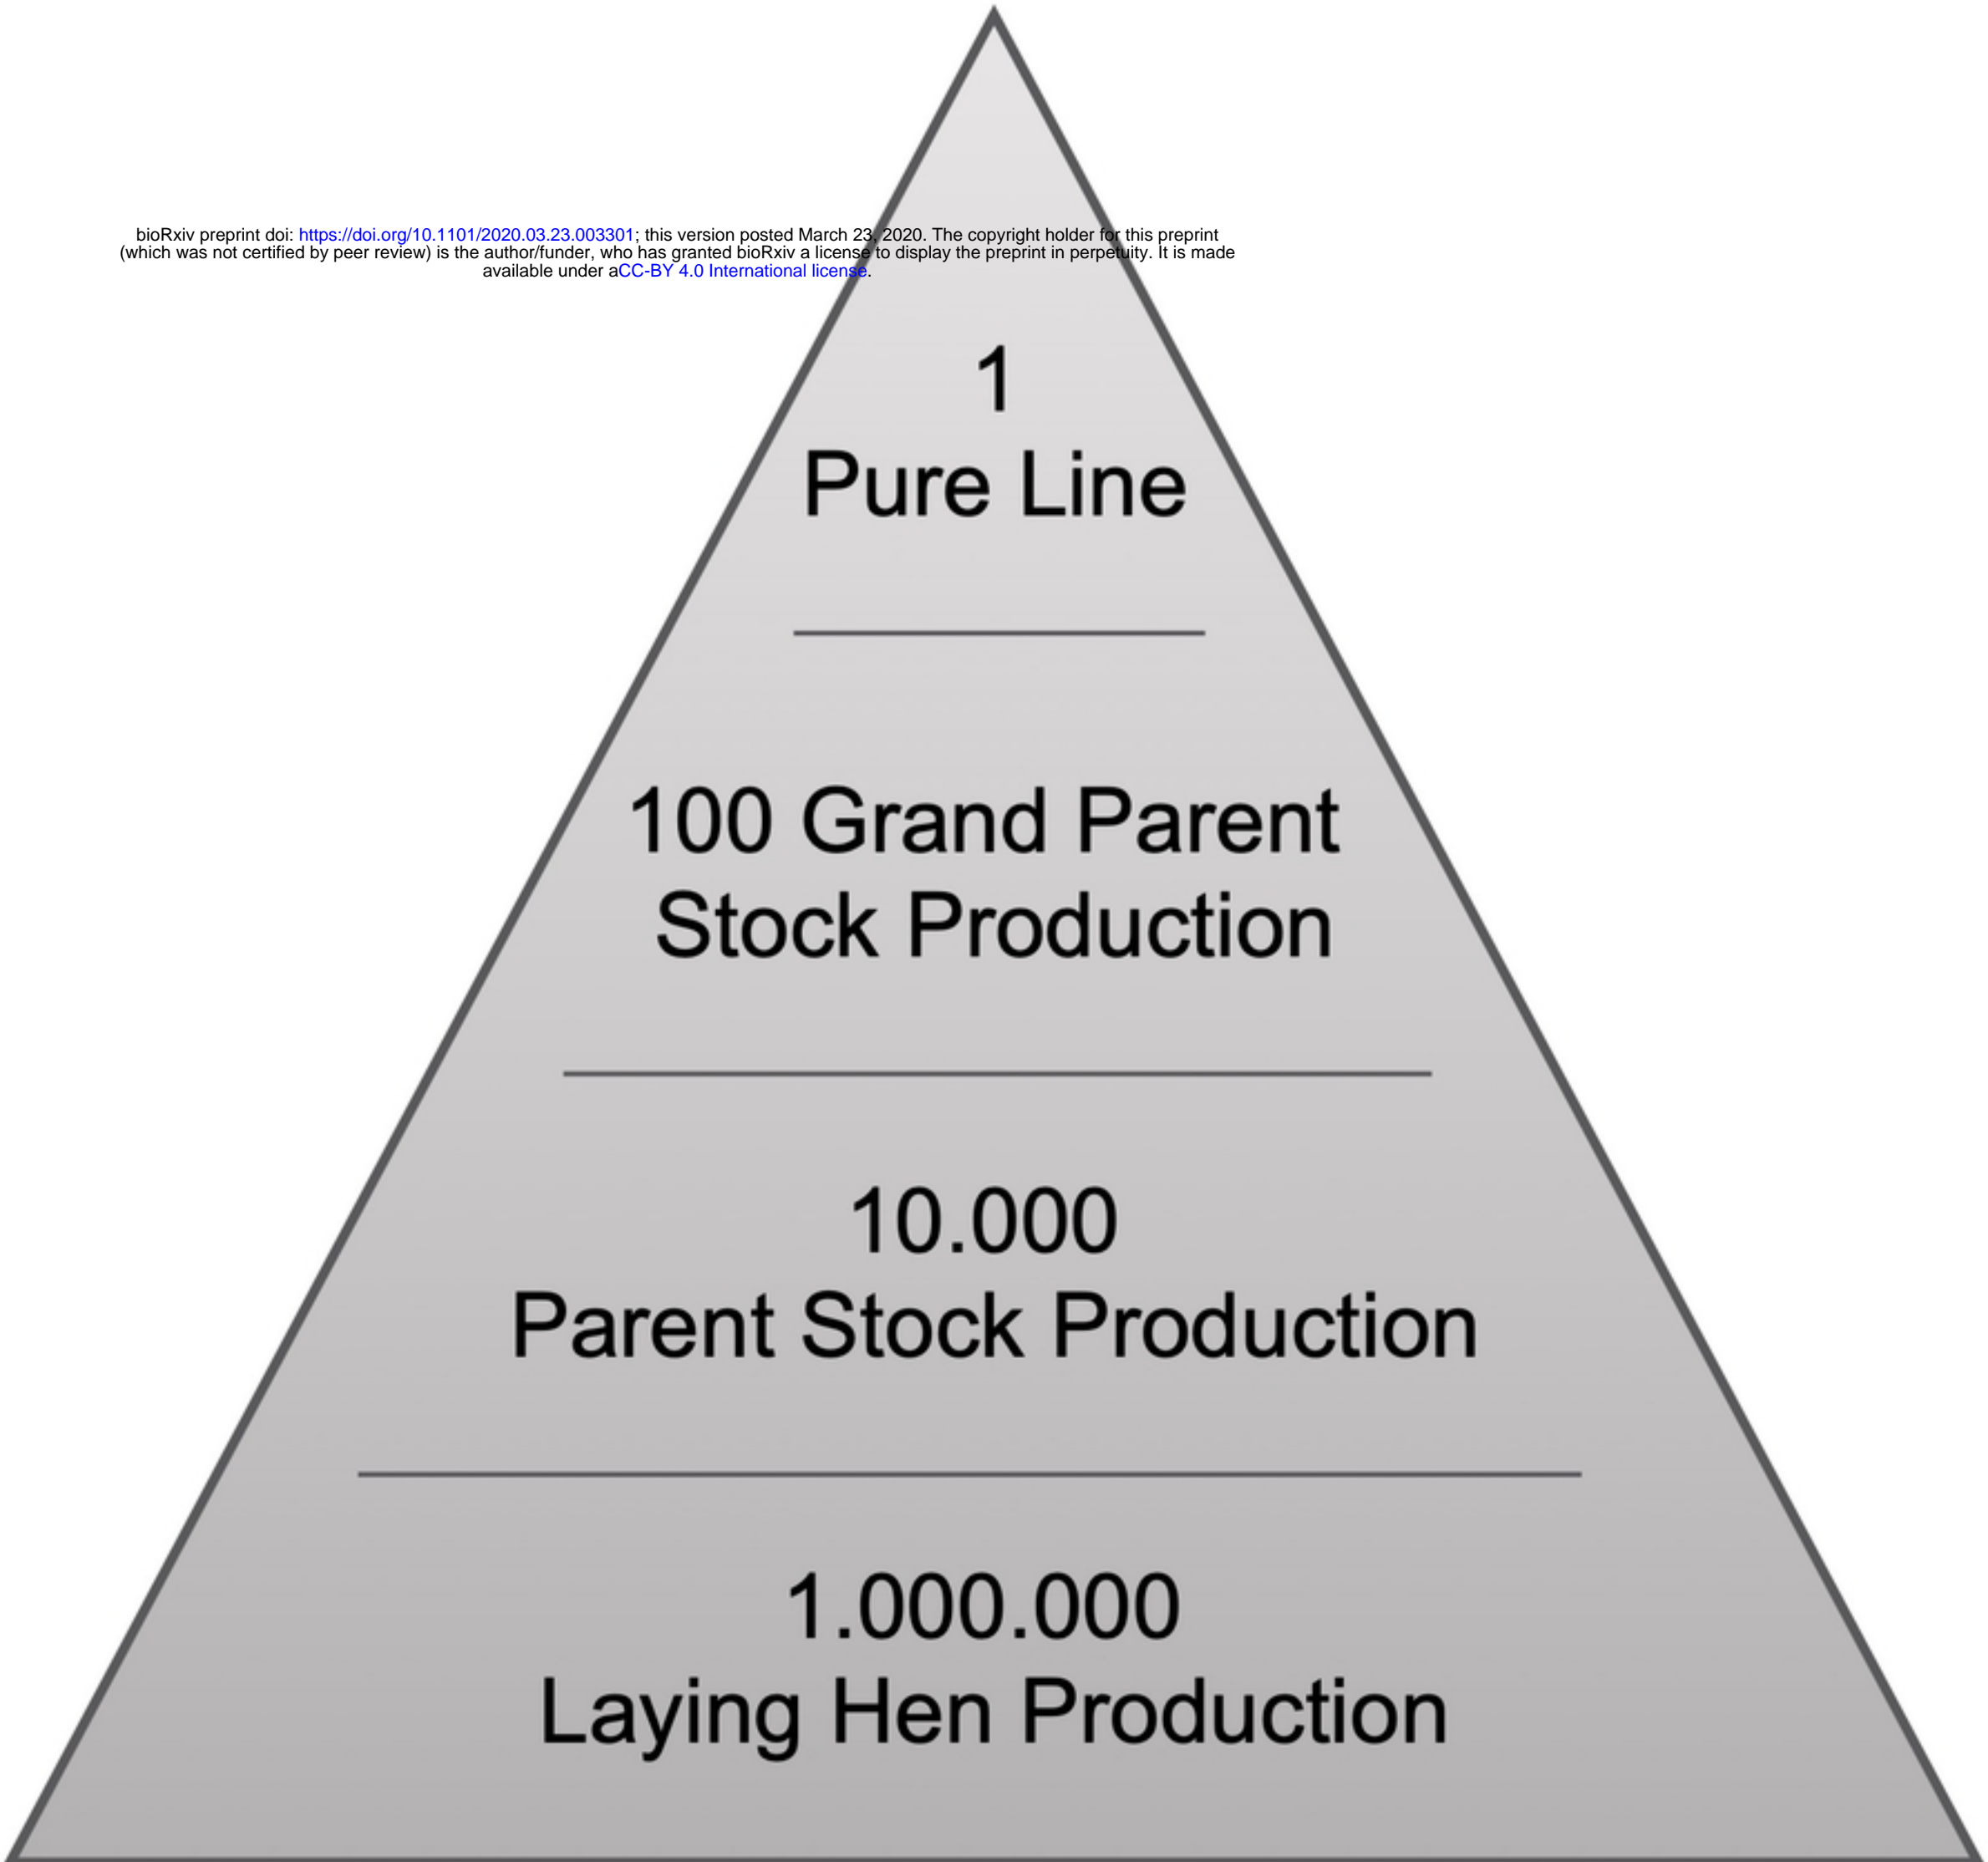

Figure 1

# Parent Stock: Control

bioRxiv preprint doi: <https://doi.org/10.1101/2020.03.23.063301>; this version posted March 23, 2020. The copyright holder for this preprint (which was not certified by peer review) is the author/funder, who has granted bioRxiv a license to display the preprint in perpetuity. It is made available under aCC-BY 4.0 International license.

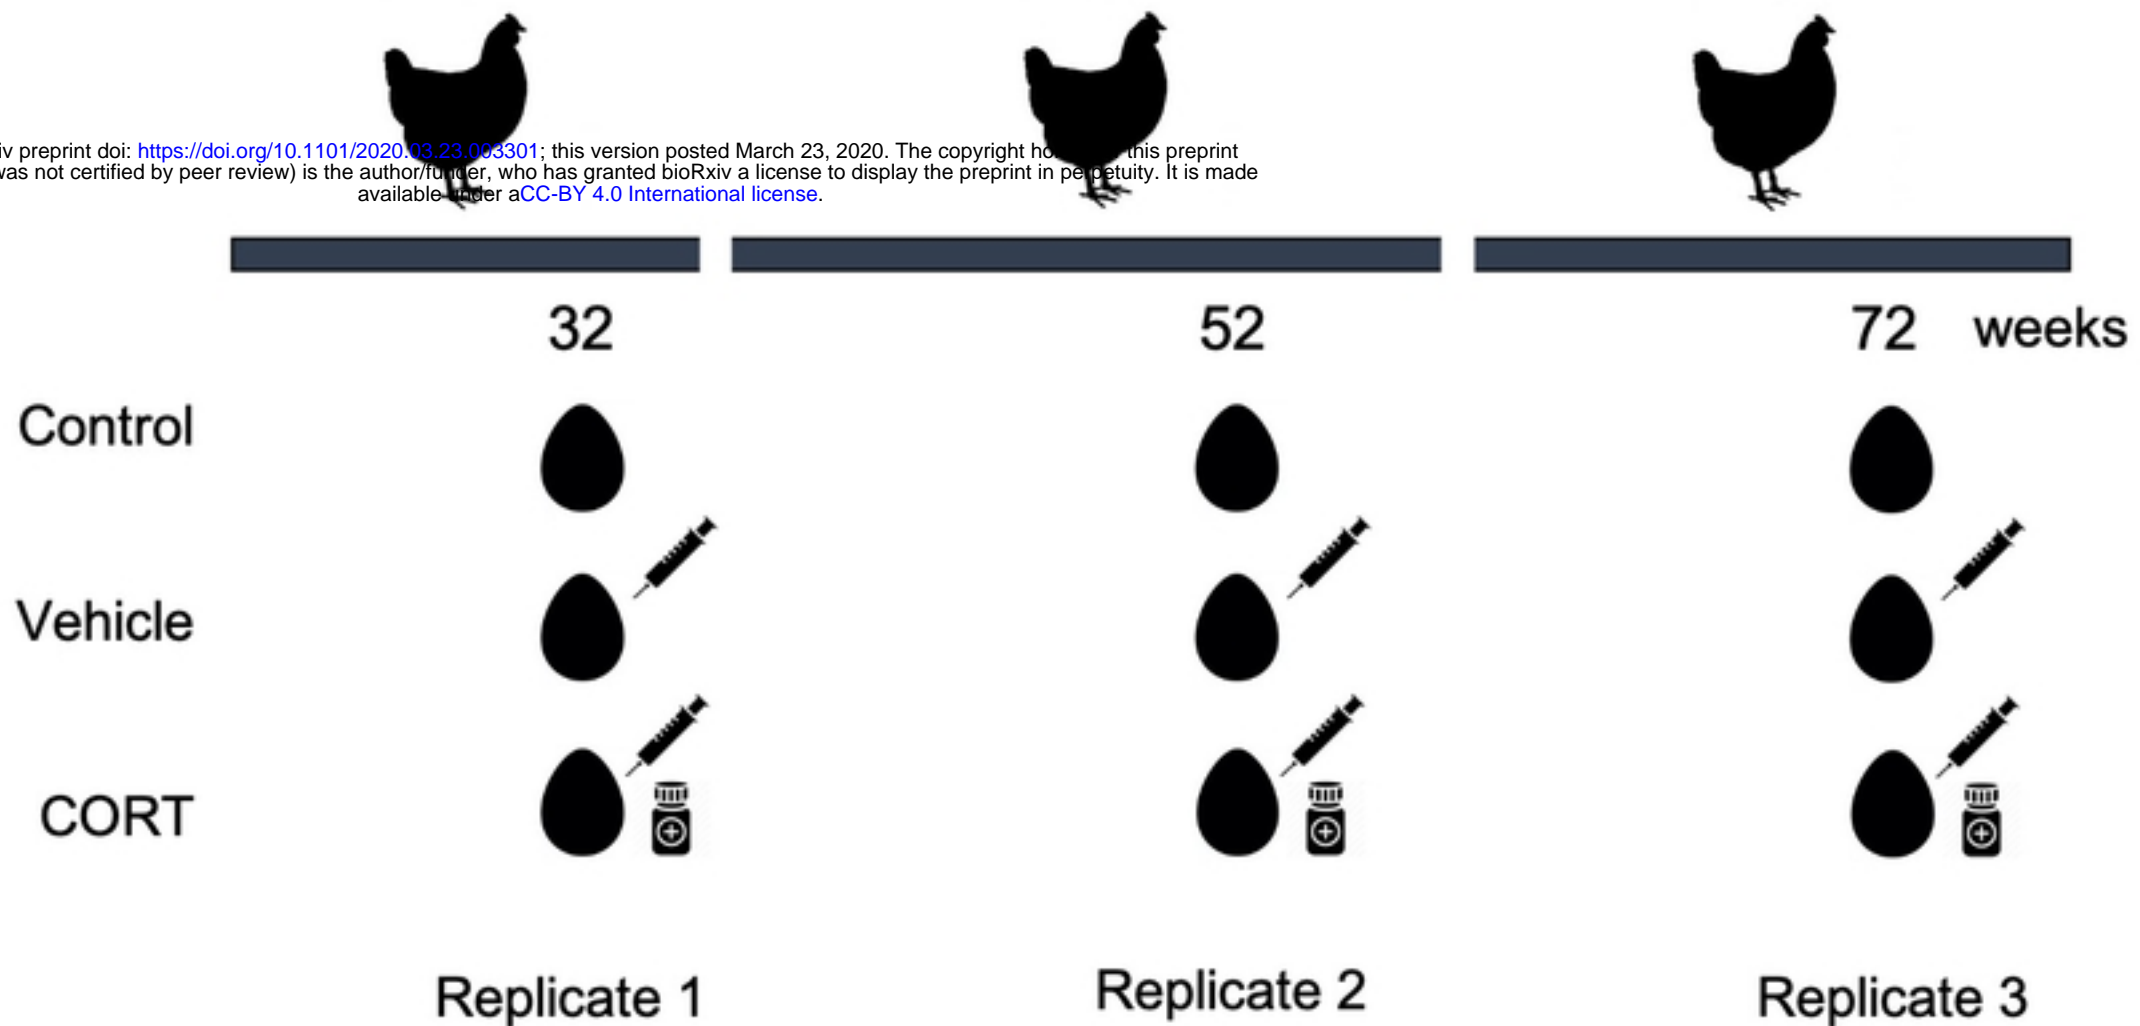

# Parent Stock: Maternal Stress

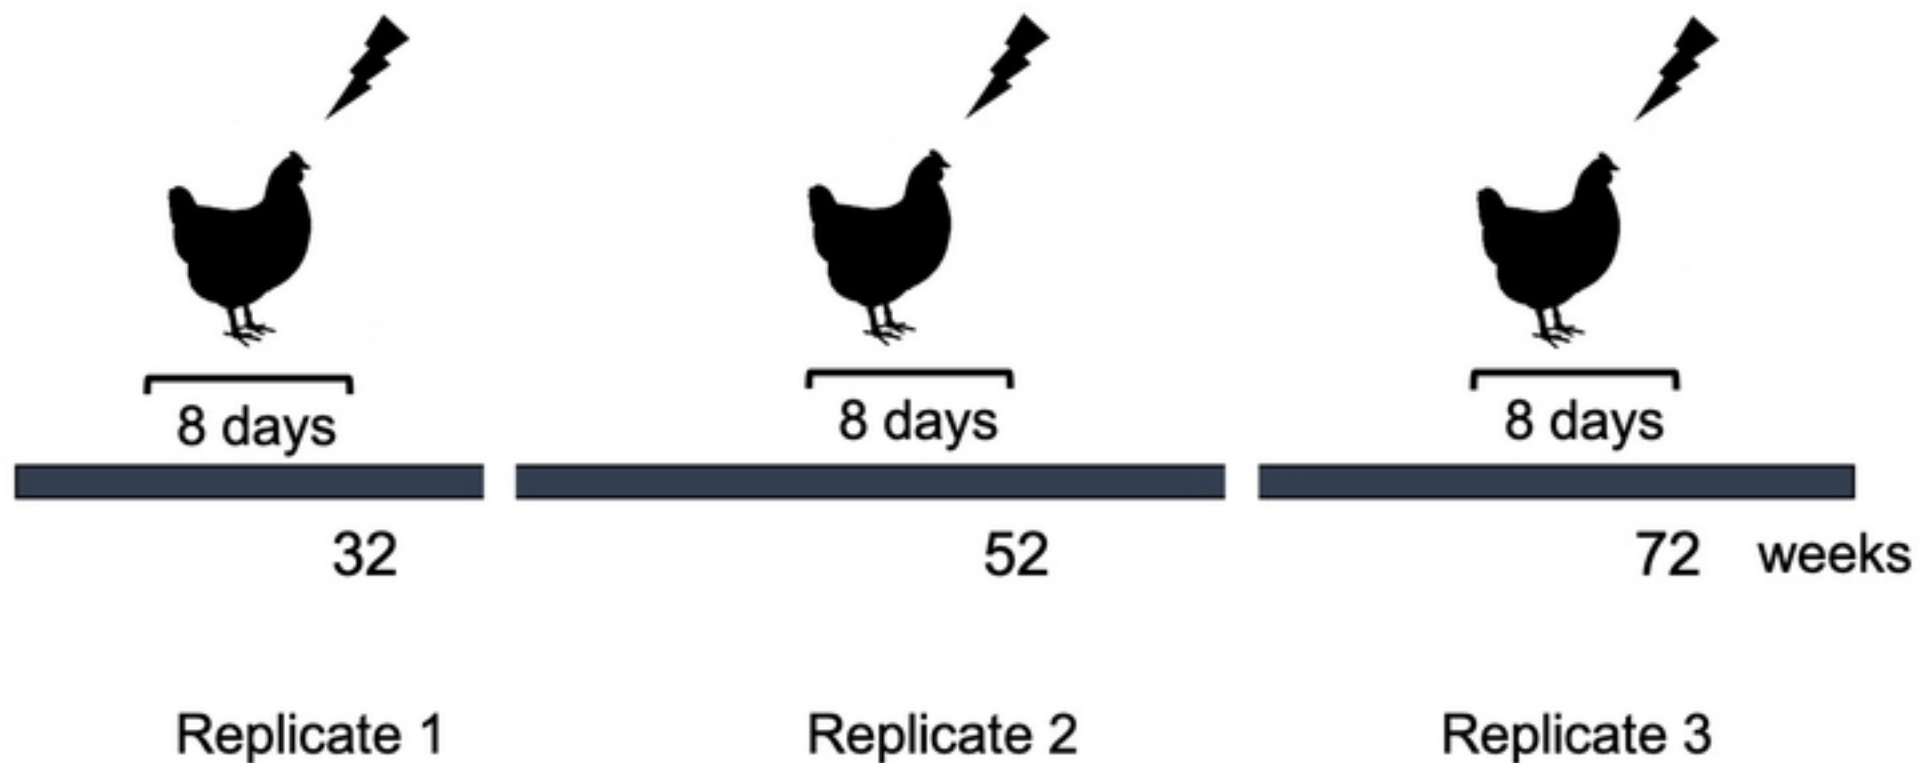

Figure 2

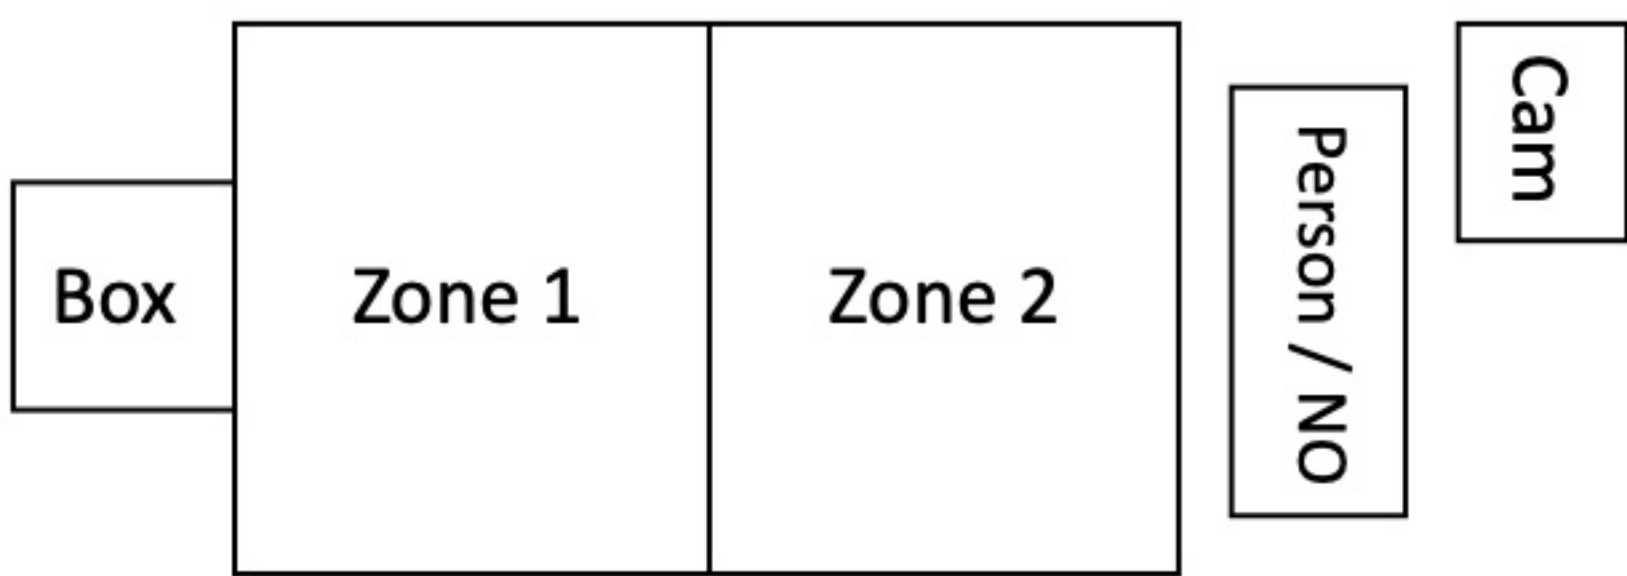

Figure 3

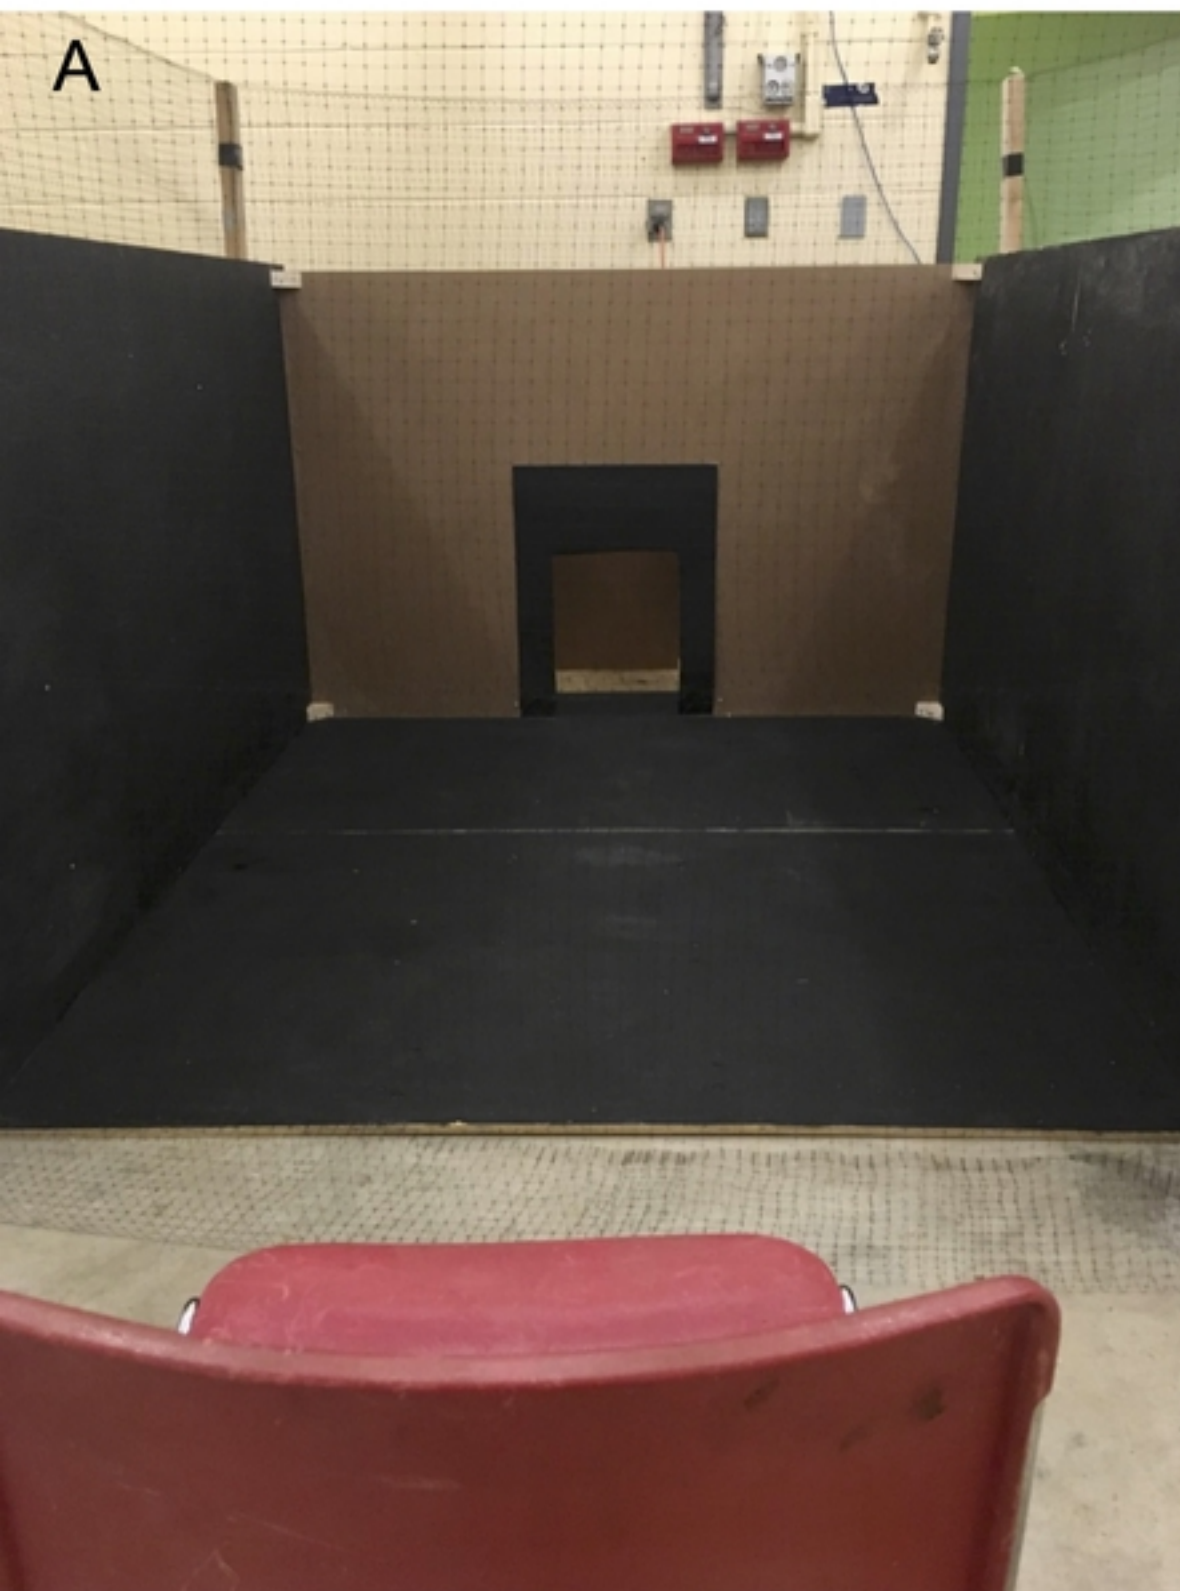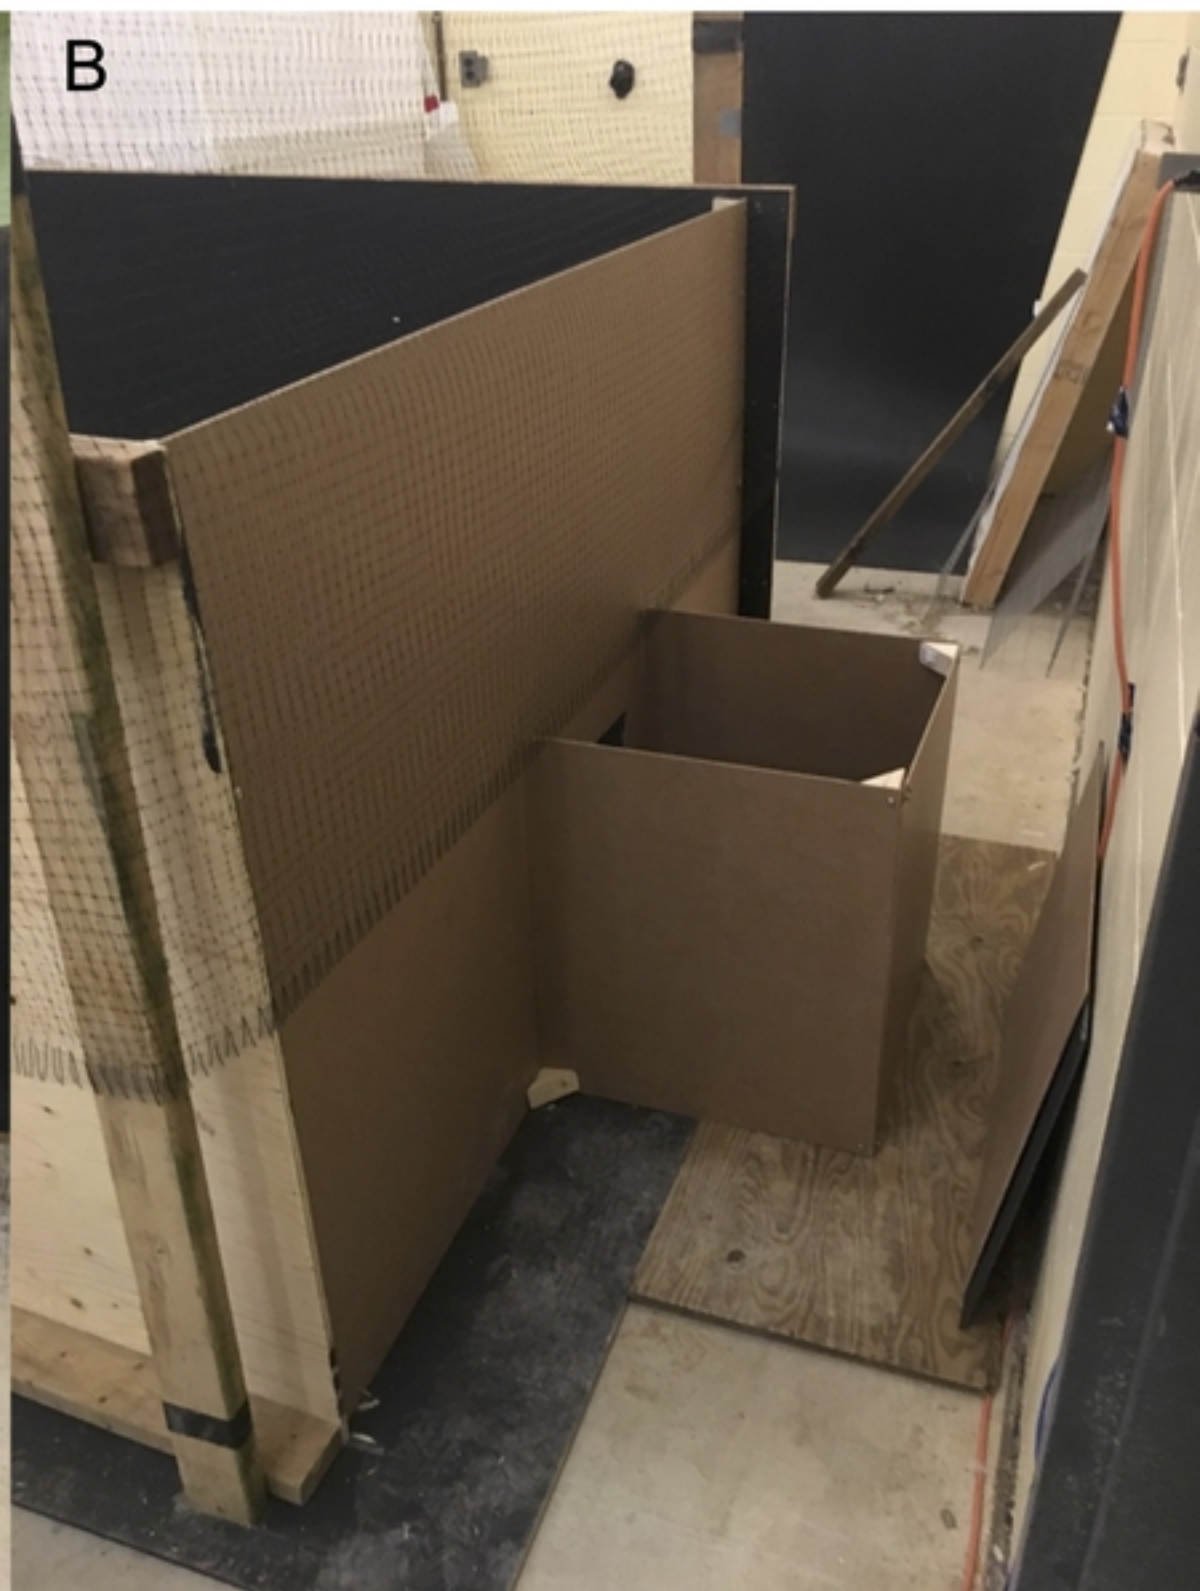

Figure 4

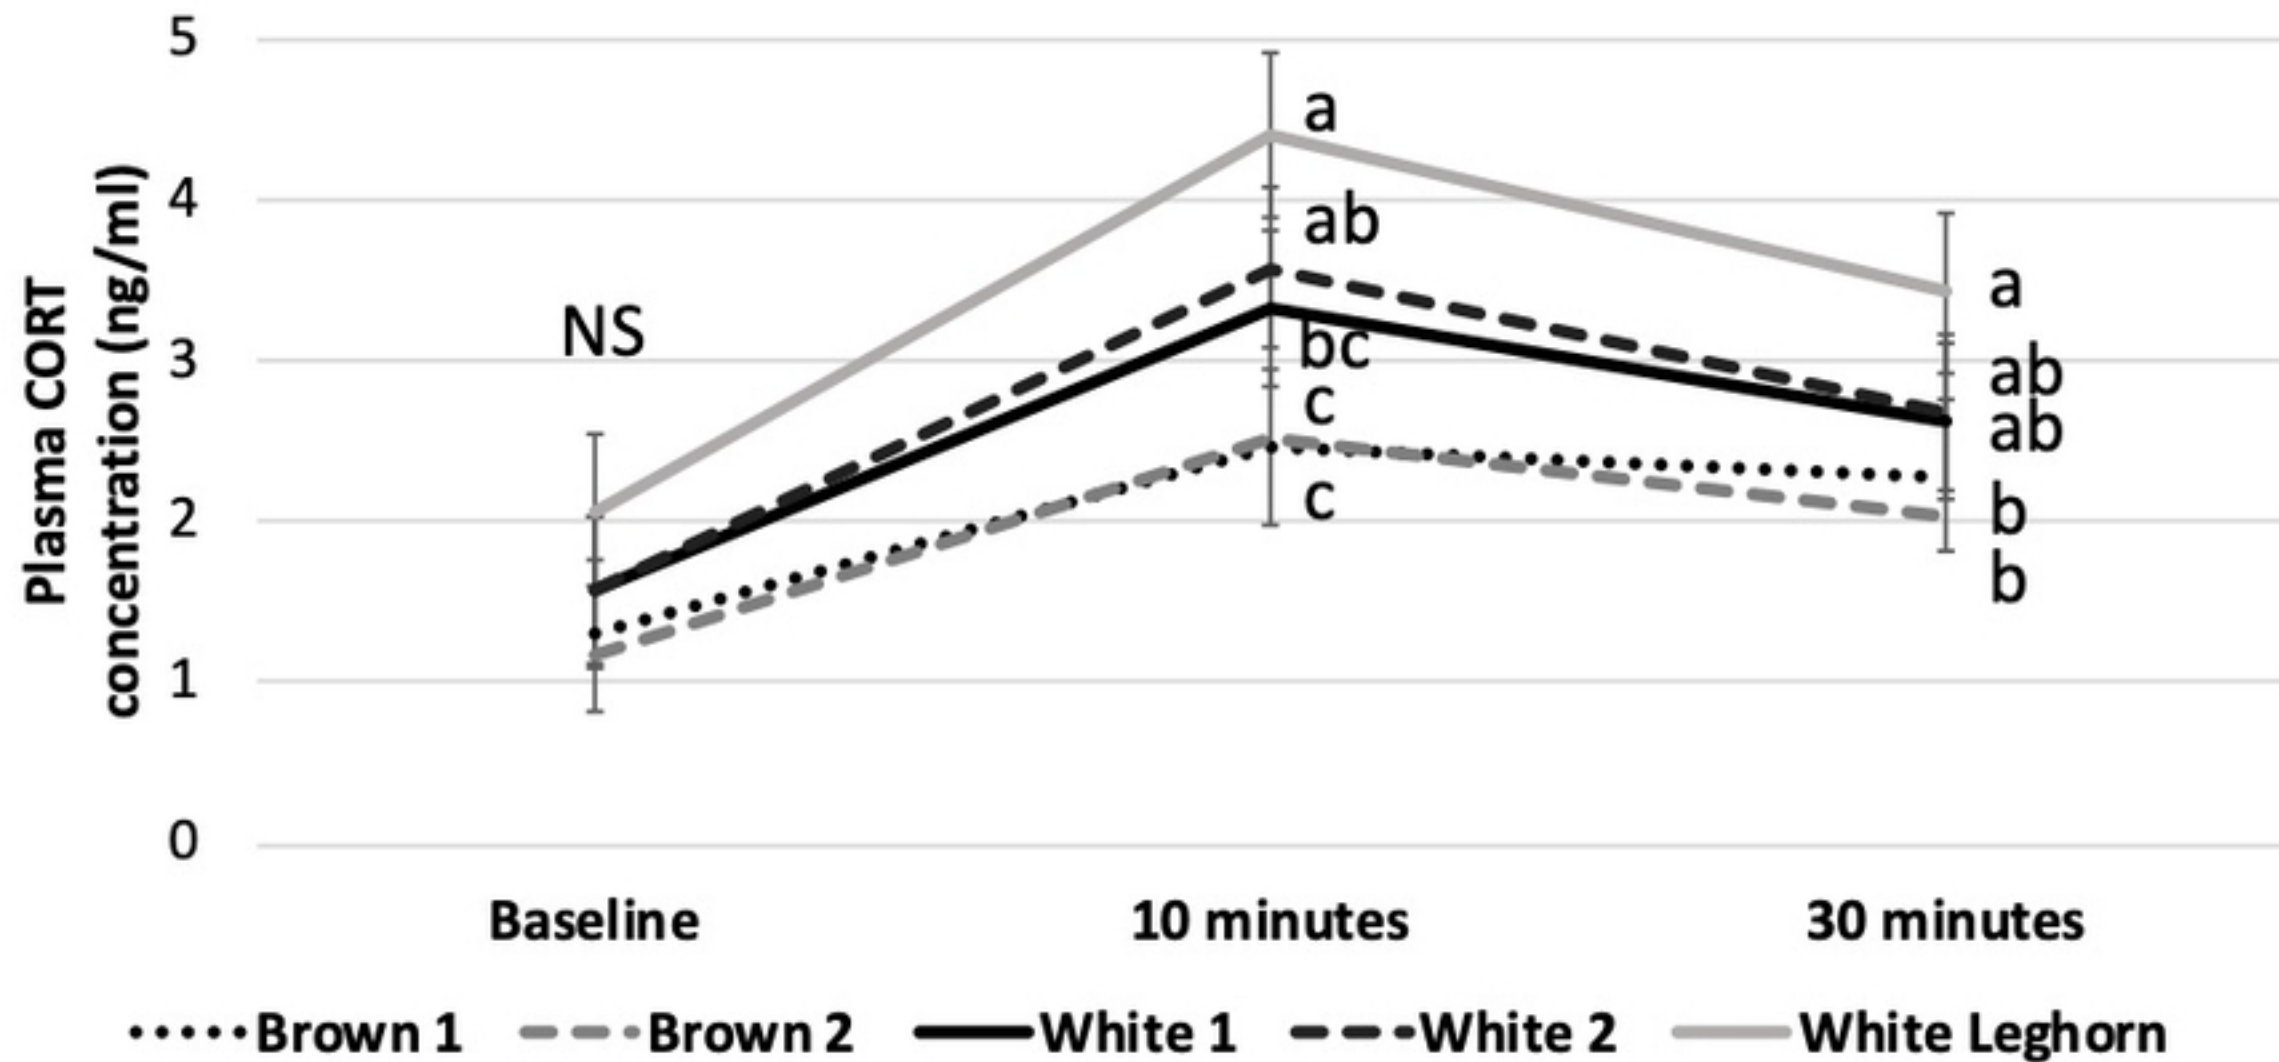

Figure 5

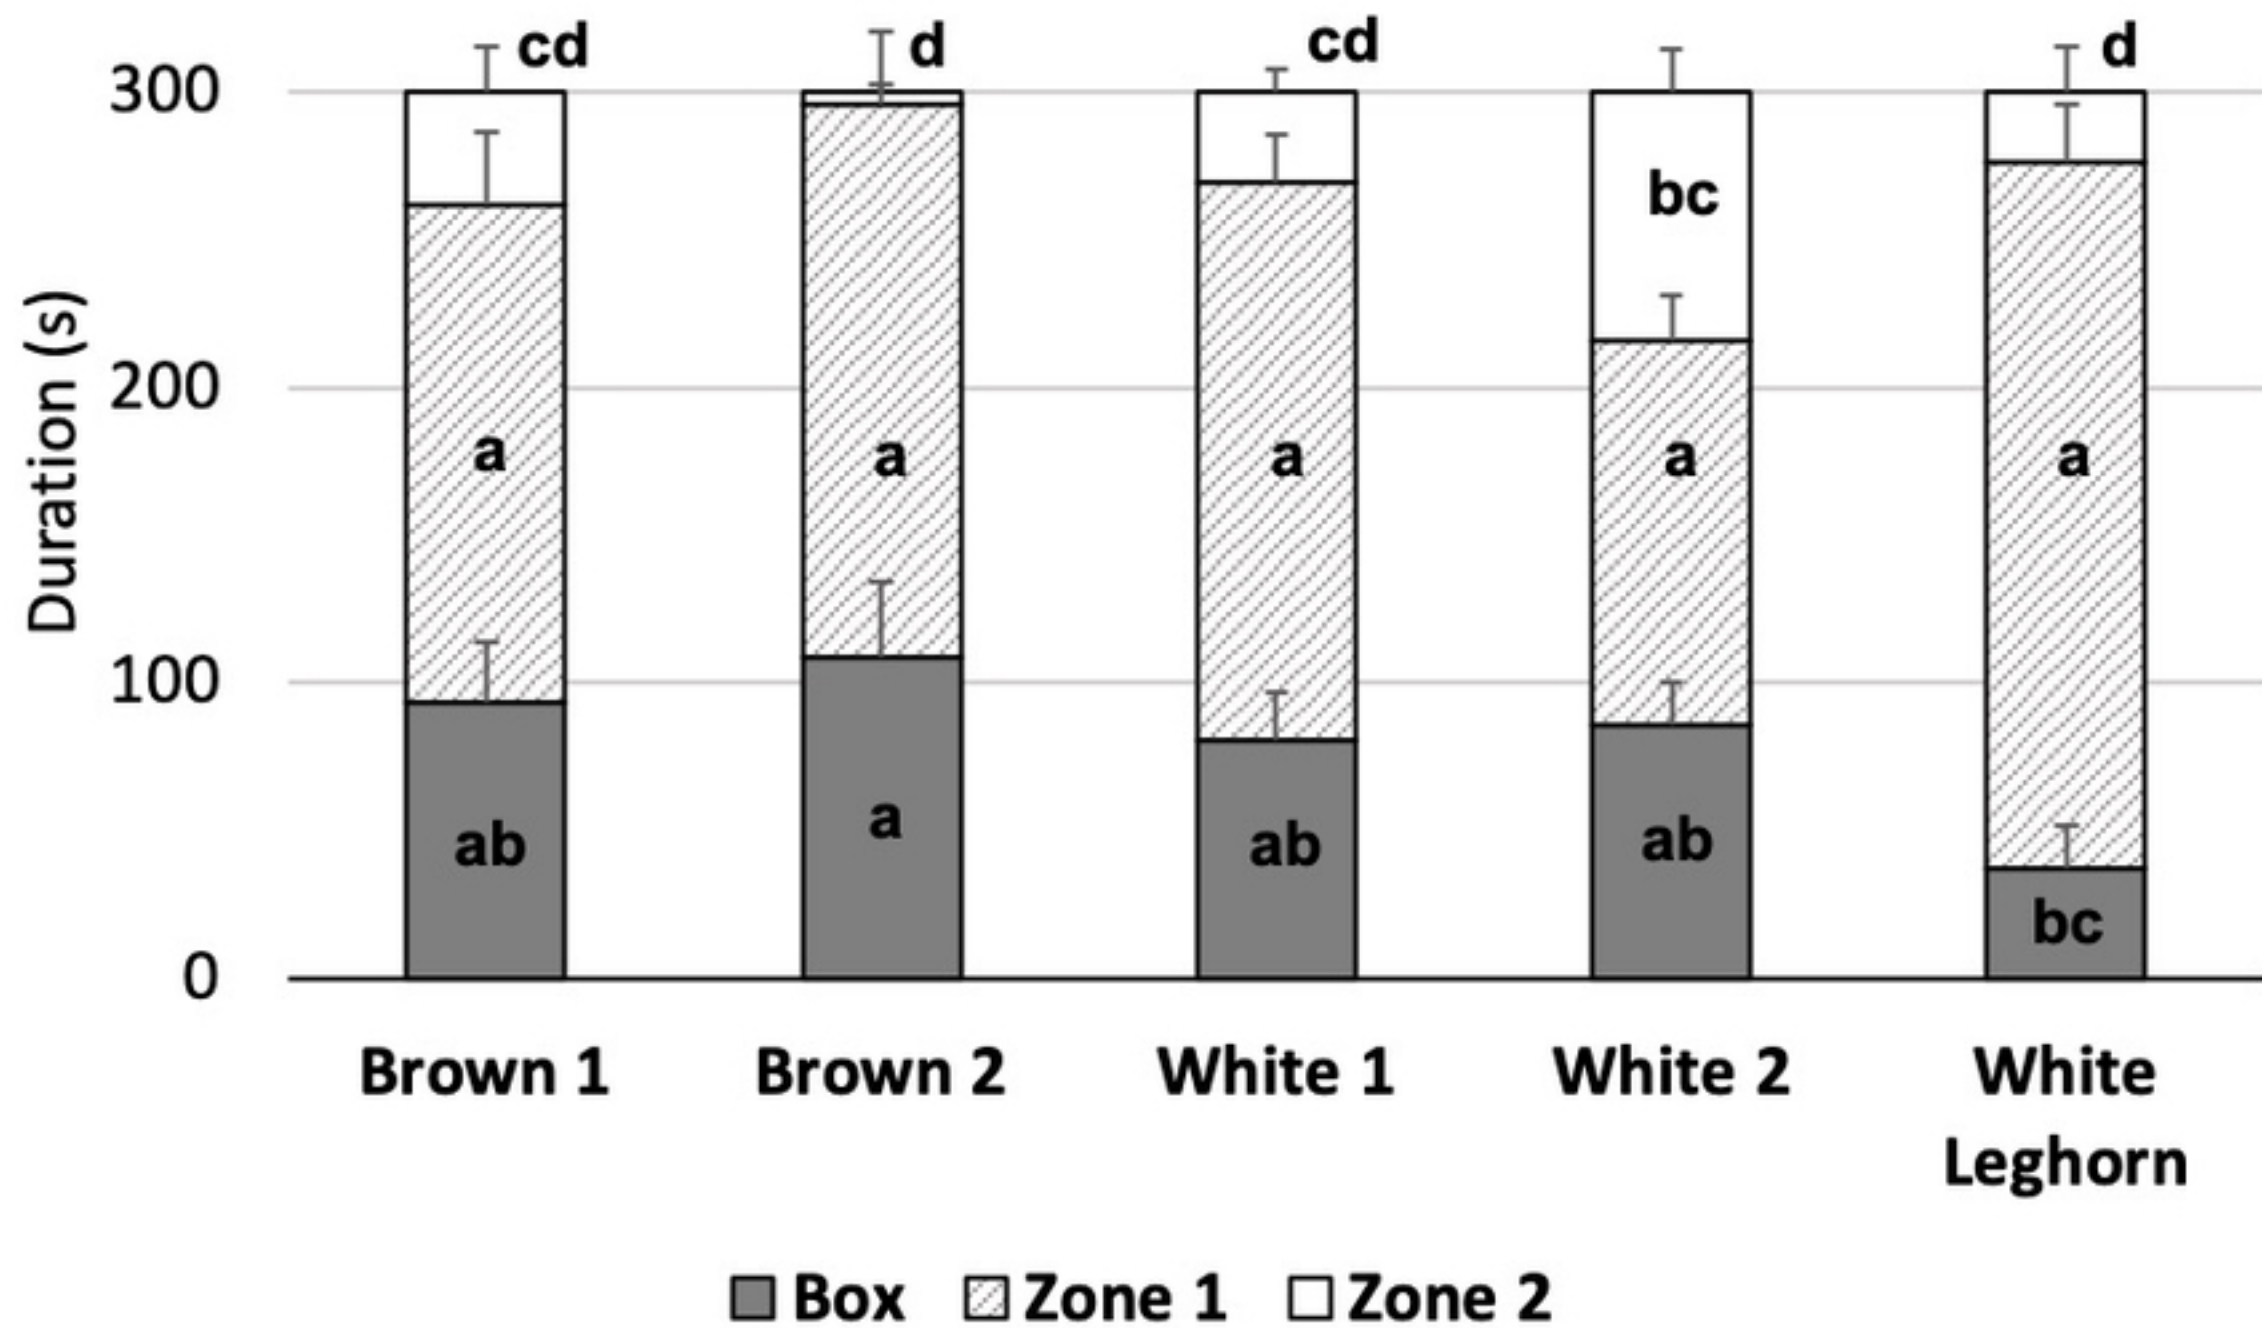

Figure 6

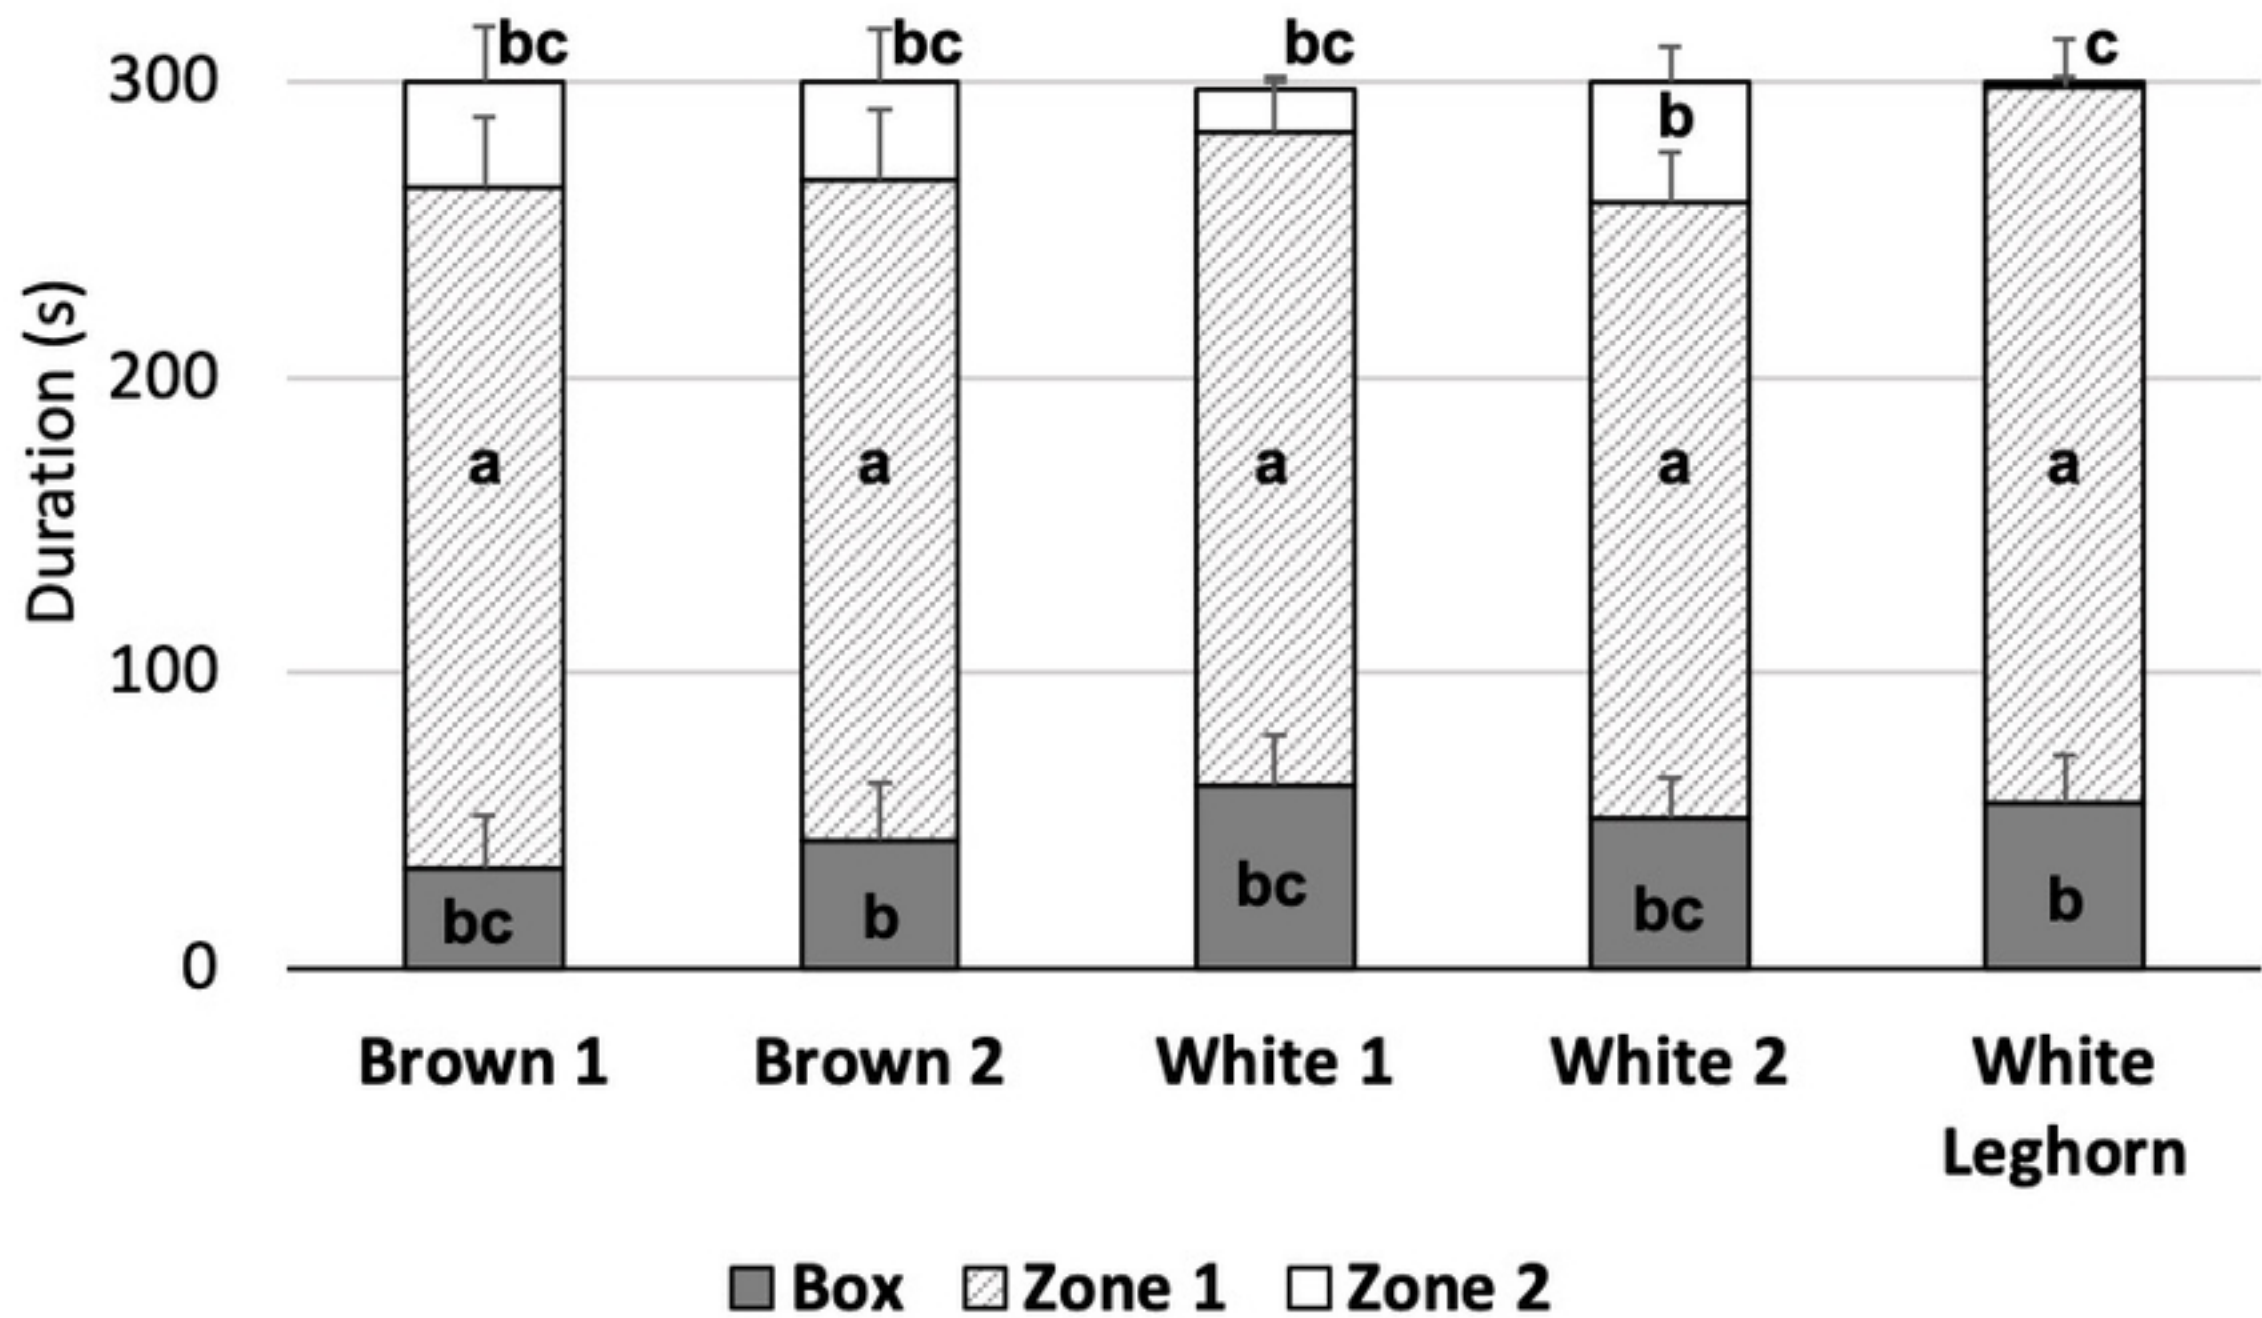

Figure 7



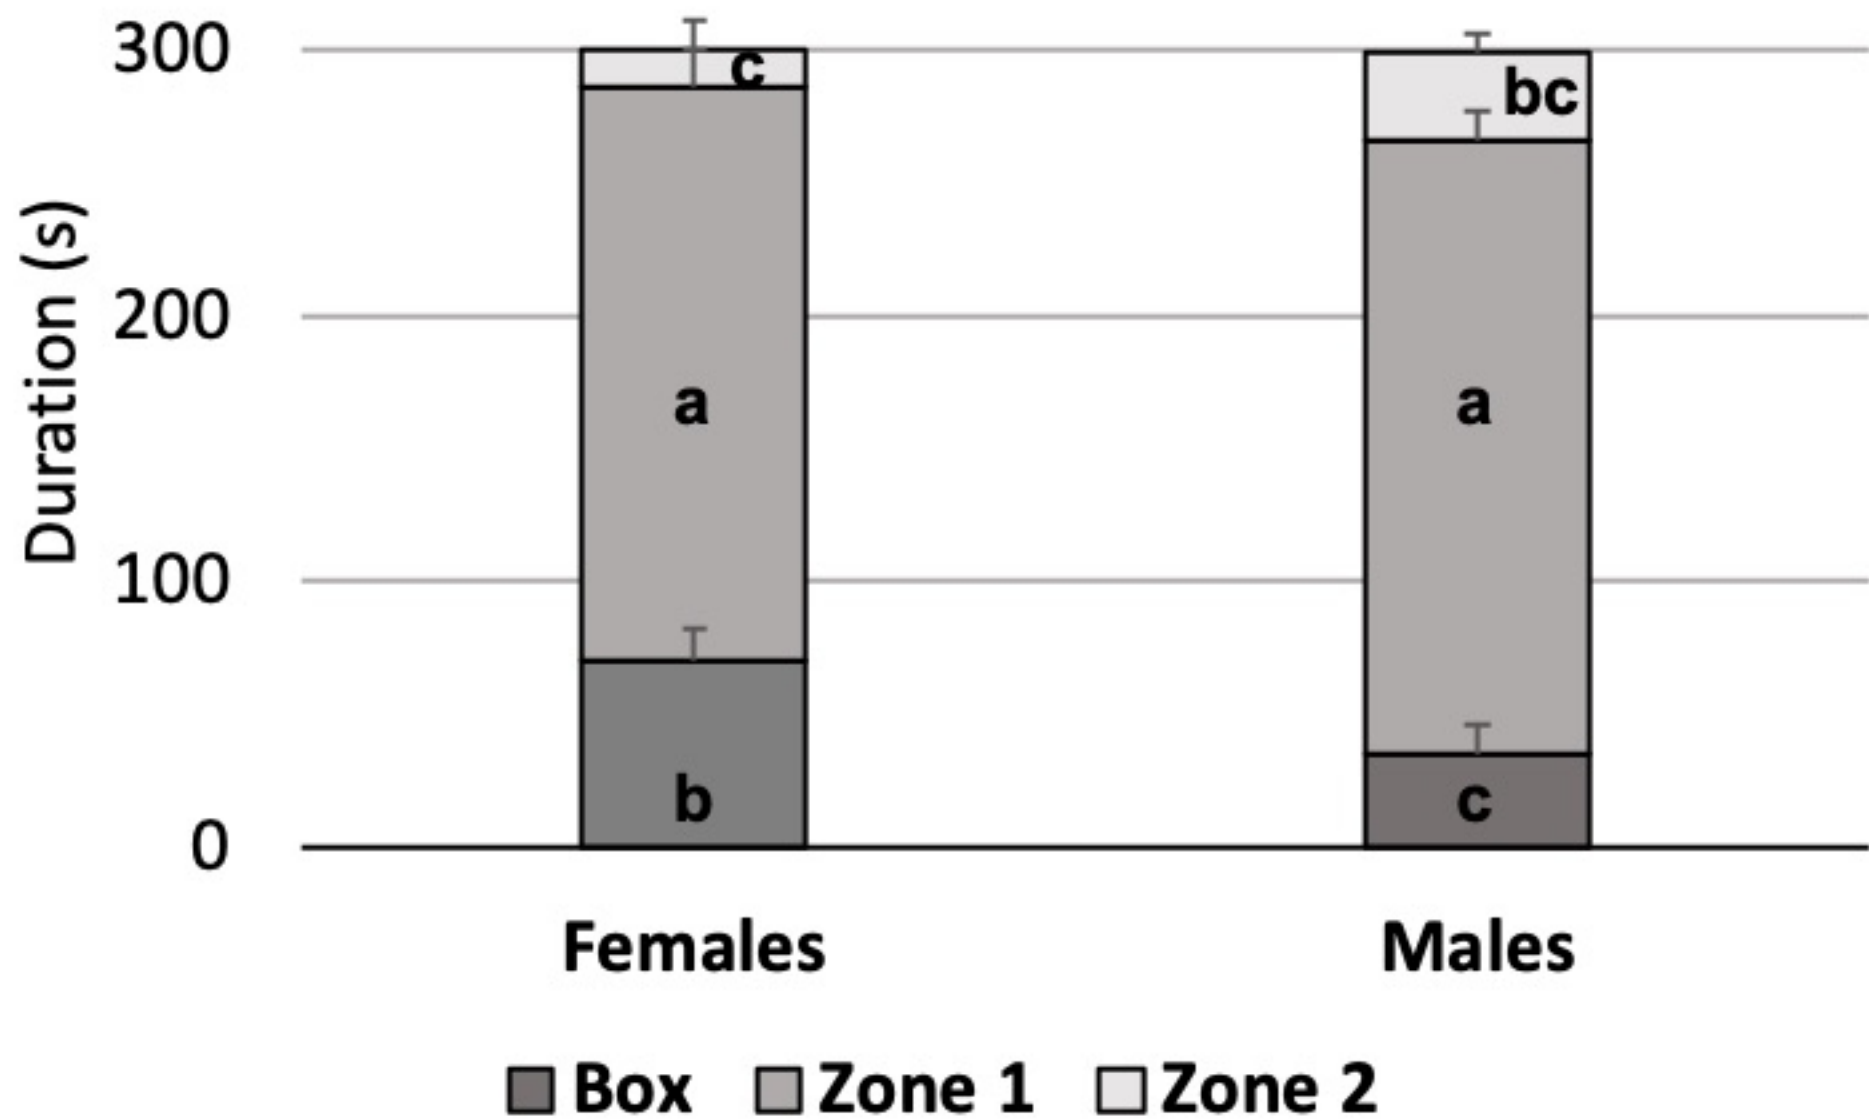

Figure 8

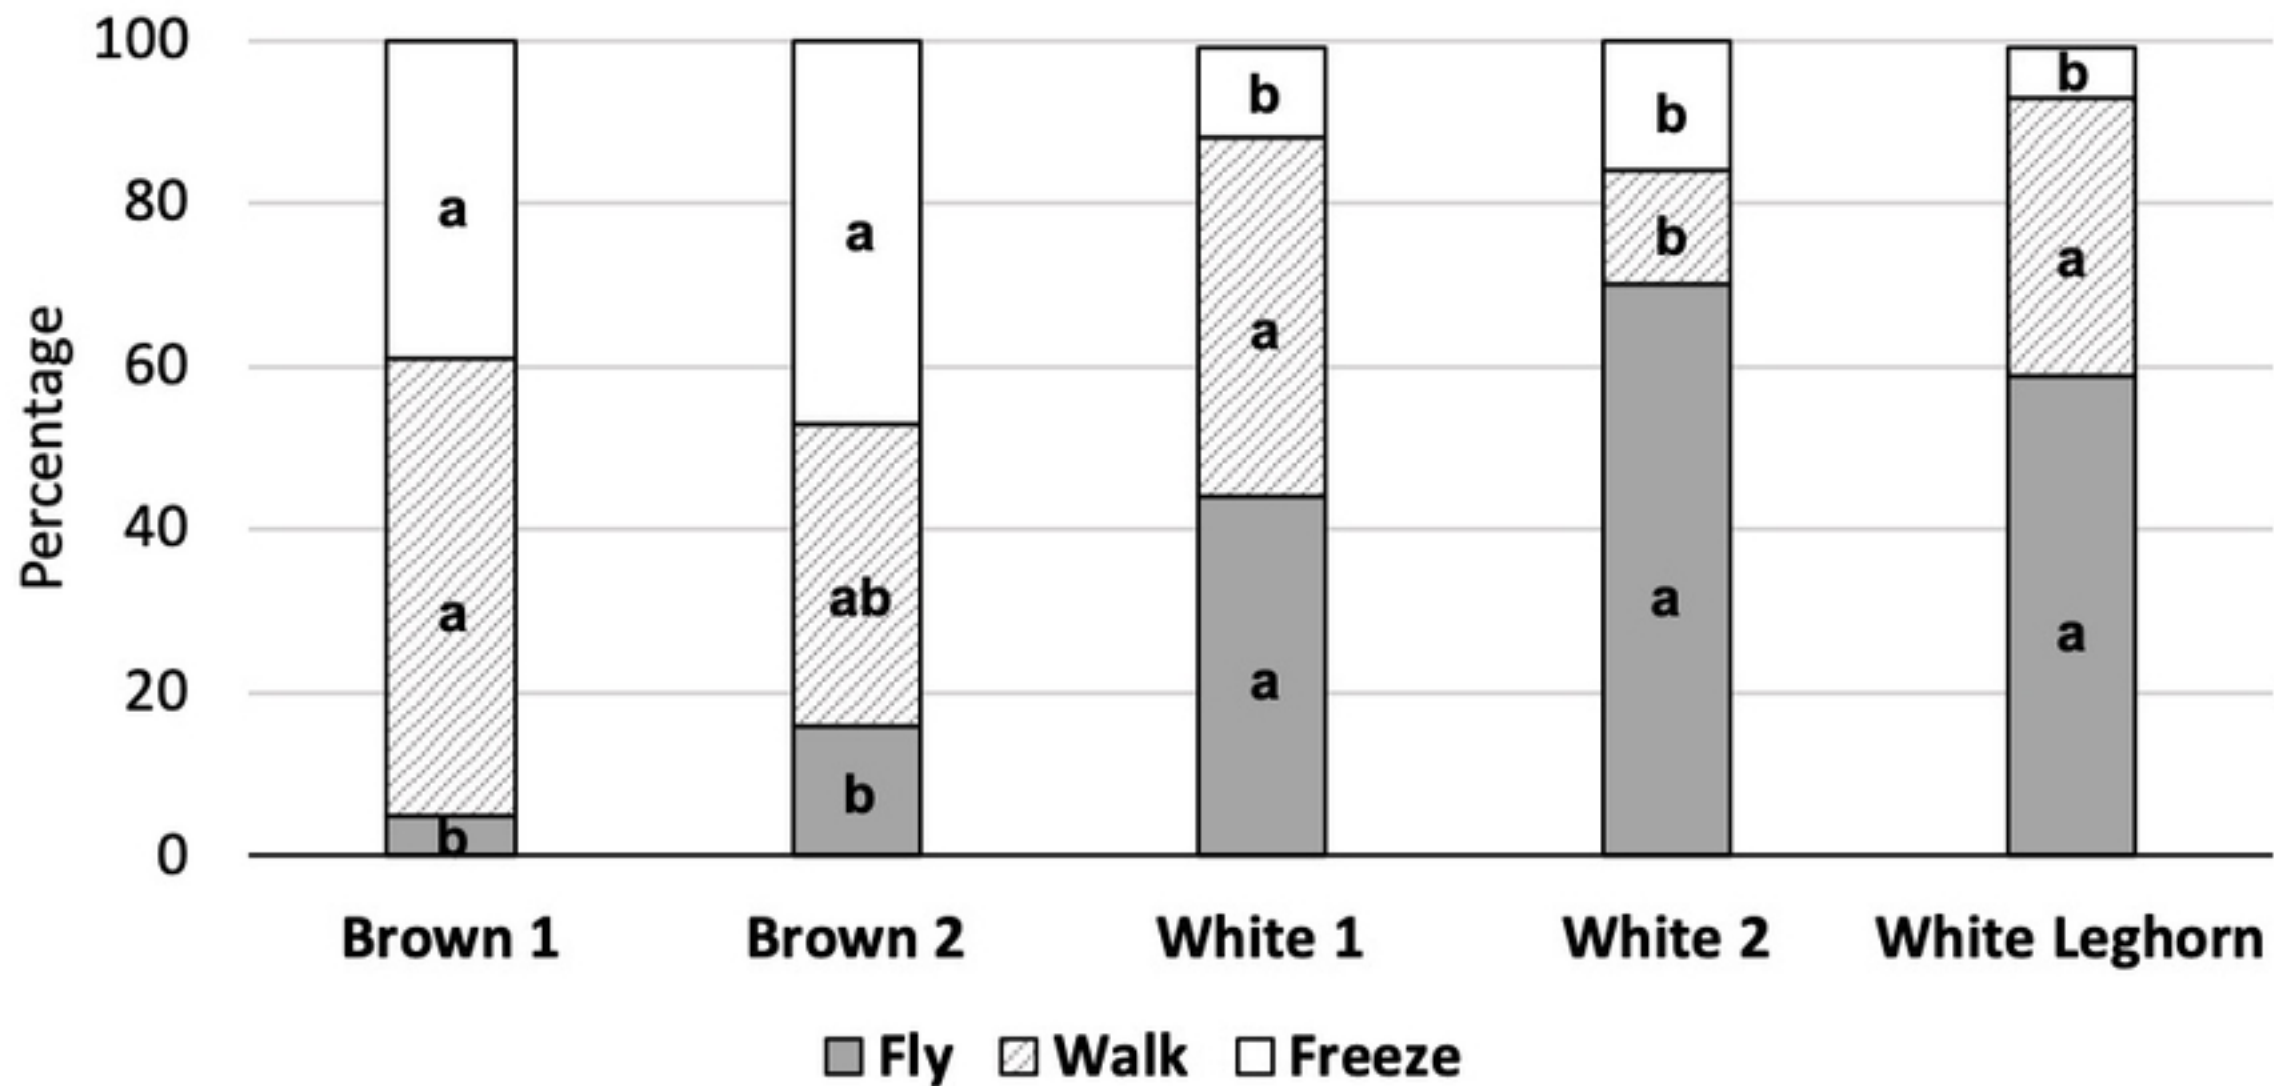

Figure 9
